# Supplementary material for: Identification of female-enriched and disease-associated microglia (FDAMic) contributes to sexual dimorphism in late-onset Alzheimer’s disease
Source: J Neuroinflammation. 2024 Jan 4;21:1. doi: 10.1186/s12974-023-02987-4 (PMC10765928; doi:10.1186/s12974-023-02987-4)
Supplement: Supplementary file 9 — Additional file 9: Table S9. Data table for heatmap visualization of gene expression trends in various APOE allelic variants. [file 12974_2023_2987_MOESM9_ESM.xls]

## Sheet: HeatmapData
Table S8—Data table for heatmap visualization of gene expression trends in various APOE allelic variants
Symbol	22||23	33	34||44	Pattern across APOE axis	Pattern of change dominated in which sex
RAB4B	0.737349	0.400895	-1.13824	Decrease	Female
ARFGAP1	0.77137	0.358452	-1.12982	Decrease	Female
GLI4	0.970451	0.0566858	-1.02714	Decrease	Female
WDR70	0.9792	0.0403777	-1.01958	Decrease	Female
PES1	0.968411	0.0604373	-1.02885	Decrease	Female
PEMT	0.739381	0.398416	-1.1378	Decrease	Female
GNL2	0.894807	0.184648	-1.07946	Decrease	Female
TMEM86B	1.13513	-0.384247	-0.750885	Decrease	Female
ICA1	0.775285	0.353438	-1.12872	Decrease	Female
OBSL1	0.85729	0.241273	-1.09856	Decrease	Female
CEP131	0.736072	0.40245	-1.13852	Decrease	Female
RPL9	0.764667	0.366974	-1.13164	Decrease	Female
LIMD2	1.02486	-0.0517246	-0.973134	Decrease	Female
ENDOV	0.813102	0.303484	-1.11659	Decrease	Female
TSC2	1.1347	-0.382012	-0.752683	Decrease	Female
CACNG2	1.00148	-0.00297607	-0.998509	Decrease	Female
RP11.791G16.2	1.03831	-0.0816201	-0.956689	Decrease	Female
SPNS1	0.832844	0.276238	-1.10908	Decrease	Female
SLC14A1	0.869761	0.22287	-1.09263	Decrease	Female
HGH1	0.81013	0.307513	-1.11764	Decrease	Female
GOLGA6L5P	1.02353	-0.0488425	-0.974684	Decrease	Female
FUT8	1.12093	-0.320369	-0.800556	Decrease	Female
KMT2E	0.775274	0.353452	-1.12873	Decrease	Female
PPP1R12A	1.10887	-0.275482	-0.833383	Decrease	Female
TMEM182	0.890468	0.191397	-1.08187	Decrease	Female
LINC01574	0.982535	0.0340596	-1.01659	Decrease	Female
RP11.306O13.1	1.07202	-0.164425	-0.907597	Decrease	Female
ODF2L	1.07162	-0.163342	-0.908273	Decrease	Female
NAT14	0.860484	0.236598	-1.09708	Decrease	Female
ASB1	1.01322	-0.0269896	-0.986232	Decrease	Female
BX322557.10	0.838193	0.268707	-1.1069	Decrease	Female
FOXK1	0.826983	0.284416	-1.1114	Decrease	Female
COMMD4	0.804412	0.315214	-1.11963	Decrease	Female
FAM98C	0.950974	0.0917319	-1.04271	Decrease	Female
FRS3	0.754821	0.379349	-1.13417	Decrease	Female
CTIF	1.11187	-0.286098	-0.82577	Decrease	Female
GON4L	0.954542	0.0854334	-1.03998	Decrease	Female
HHATL	0.981438	0.0361448	-1.01758	Decrease	Female
RP11.848P1.4	1.0196	-0.0404282	-0.979173	Decrease	Female
MACROD1	0.915692	0.151359	-1.06705	Decrease	Female
TSEN2	1.0257	-0.0535465	-0.972151	Decrease	Female
SPATA2L	0.886327	0.197787	-1.08411	Decrease	Female
ZNF75A	0.837121	0.270222	-1.10734	Decrease	Female
CHD6	1.09979	-0.245193	-0.854598	Decrease	Female
TMEM222	0.893171	0.1872	-1.08037	Decrease	Female
DPH1	0.999369	0.00126154	-1.00063	Decrease	Female
RPL7L1	1.05202	-0.113762	-0.938254	Decrease	Female
LINC01609	1.05645	-0.124578	-0.931874	Decrease	Female
AKAP9	0.956128	0.0826186	-1.03875	Decrease	Female
SPPL2B	0.722437	0.418887	-1.14132	Decrease	Female
TANGO2	0.790318	0.333914	-1.12423	Decrease	Female
MTHFR	1.10002	-0.245927	-0.854093	Decrease	Female
PCLO	1.0975	-0.23791	-0.85959	Decrease	Female
ATF6B	1.11898	-0.312669	-0.806307	Decrease	Female
RSF1	0.998107	0.00377478	-1.00188	Decrease	Female
RGS11	0.912715	0.15619	-1.0689	Decrease	Female
SPON2	0.806173	0.312849	-1.11902	Decrease	Female
ATAD3B	0.900257	0.176092	-1.07635	Decrease	Female
AC005154.6	1.04539	-0.097984	-0.947401	Decrease	Female
BAZ2B	1.09863	-0.241485	-0.857145	Decrease	Female
TRMT2A	0.872877	0.218209	-1.09109	Decrease	Female
PNMT	0.808269	0.310026	-1.1183	Decrease	Female
SART1	1.08494	-0.200165	-0.884778	Decrease	Female
INF2	1.00554	-0.0111636	-0.994371	Decrease	Female
LINC00504	1.10535	-0.263452	-0.841899	Decrease	Female
NRDC	0.947028	0.0986343	-1.04566	Decrease	Female
NDUFS8	0.790805	0.333275	-1.12408	Decrease	Female
PRMT7	0.926571	0.133456	-1.06003	Decrease	Female
BBS5	0.838354	0.26848	-1.10683	Decrease	Female
CORO6	0.890441	0.191439	-1.08188	Decrease	Female
PPP1R1B	1.00063	-0.00125972	-0.99937	Decrease	Female
RP11.713P17.3	0.759174	0.373899	-1.13307	Decrease	Female
ZNF517	0.891237	0.190206	-1.08144	Decrease	Female
TFPT	0.78313	0.343303	-1.12643	Decrease	Female
CTC.338M12.5	0.975069	0.0481251	-1.02319	Decrease	Female
SPIRE2	0.99741	0.00516098	-1.00257	Decrease	Female
STK11	0.970183	0.0571796	-1.02736	Decrease	Female
NTNG2	0.944601	0.10285	-1.04745	Decrease	Female
BORCS8	0.729525	0.41038	-1.1399	Decrease	Female
HES5	0.734814	0.403979	-1.13879	Decrease	Female
ESF1	0.735239	0.403463	-1.1387	Decrease	Female
NUDT8	0.988717	0.0221972	-1.01091	Decrease	Female
SFI1	0.949673	0.0940135	-1.04369	Decrease	Female
FAM173A	0.926154	0.134149	-1.0603	Decrease	Female
ZNF316	0.980865	0.0372302	-1.0181	Decrease	Female
GAMT	0.845521	0.258283	-1.1038	Decrease	Female
RABGGTA	1.09975	-0.245059	-0.854691	Decrease	Female
YTHDC1	0.955822	0.0831628	-1.03898	Decrease	Female
NOC4L	0.785908	0.339686	-1.12559	Decrease	Female
RPL36	1.00674	-0.0136206	-0.99312	Decrease	Female
ZNF580	1.09648	-0.234727	-0.861757	Decrease	Female
ARID4A	0.879978	0.20749	-1.08747	Decrease	Female
FAM133B	1.06515	-0.146458	-0.918695	Decrease	Female
ZNF587	1.0781	-0.180891	-0.897207	Decrease	Female
KCNAB3	0.852209	0.248659	-1.10087	Decrease	Female
SNX22	1.09408	-0.227288	-0.866792	Decrease	Female
LKAAEAR1	0.790306	0.33393	-1.12424	Decrease	Female
CES4A	0.789107	0.335503	-1.12461	Decrease	Female
HSPB6	0.836904	0.270529	-1.10743	Decrease	Female
LINC00937	0.934539	0.120079	-1.05462	Decrease	Female
TNNT2	0.730647	0.409026	-1.13967	Decrease	Female
CRIP3	0.7375	0.400711	-1.13821	Decrease	Female
MEIS3	0.842396	0.262744	-1.10514	Decrease	Female
POLRMT	0.994294	0.0113154	-1.00561	Decrease	Female
SRRM3	1.12115	-0.321284	-0.79987	Decrease	Female
SSNA1	1.07276	-0.166383	-0.906373	Decrease	Female
NUDT22	1.07998	-0.186104	-0.893874	Decrease	Female
PCSK1N	0.923827	0.13801	-1.06184	Decrease	Female
LIMS2	0.869976	0.22255	-1.09253	Decrease	Female
FAAH	0.845831	0.25784	-1.10367	Decrease	Female
GOLGB1	0.73185	0.407571	-1.13942	Decrease	Female
ATP13A2	0.777058	0.351158	-1.12822	Decrease	Female
PSMB2	0.958971	0.0775431	-1.03651	Decrease	Female
LINC01535	1.09724	-0.23708	-0.860155	Decrease	Female
PNMAL2	0.788256	0.336617	-1.12487	Decrease	Female
ZNF213.AS1	0.931753	0.124782	-1.05654	Decrease	Female
ACAP3	0.887826	0.19548	-1.08331	Decrease	Female
RPLP2	0.755348	0.37869	-1.13404	Decrease	Female
CAMK2N2	0.795423	0.327187	-1.12261	Decrease	Female
ZNF500	1.10171	-0.251403	-0.850309	Decrease	Female
PHF7	0.815235	0.30058	-1.11582	Decrease	Female
ZC3H6	0.998156	0.00367705	-1.00183	Decrease	Female
AMDHD2	1.00072	-0.00143562	-0.999281	Decrease	Female
HAUS7	0.999131	0.00173583	-1.00087	Decrease	Female
PHLDA3	0.758335	0.374952	-1.13329	Decrease	Female
PLIN5	1.01553	-0.0318212	-0.98371	Decrease	Female
INAFM1	1.02728	-0.0569912	-0.970286	Decrease	Female
DTNB	0.885006	0.199815	-1.08482	Decrease	Female
CYB5D2	0.790991	0.33303	-1.12402	Decrease	Female
ATP5D	0.782908	0.343591	-1.1265	Decrease	Female
RASSF8.AS1	0.81313	0.303445	-1.11658	Decrease	Female
RP11.307B6.3	0.934567	0.120031	-1.0546	Decrease	Female
SURF6	0.878207	0.210176	-1.08838	Decrease	Female
RBM3	0.798383	0.323262	-1.12164	Decrease	Female
CTD.2336O2.1	0.871812	0.219806	-1.09162	Decrease	Female
ZNF688	0.873833	0.216775	-1.09061	Decrease	Female
ABHD17A	0.746986	0.389074	-1.13606	Decrease	Female
UPK3BL	0.850487	0.251147	-1.10163	Decrease	Female
NENF	0.757585	0.375892	-1.13348	Decrease	Female
FUT11	1.04631	-0.100165	-0.946148	Decrease	Female
U47924.6	0.960912	0.0740579	-1.03497	Decrease	Female
PACSIN3	0.968821	0.0596847	-1.02851	Decrease	Female
ACACB	0.946881	0.0988907	-1.04577	Decrease	Female
GABPB1.AS1	0.858775	0.239103	-1.09788	Decrease	Female
BPTF	0.845873	0.257779	-1.10365	Decrease	Female
SYT11	0.989183	0.021293	-1.01048	Decrease	Female
ZNF524	0.921712	0.141502	-1.06321	Decrease	Female
ASPSCR1	1.10949	-0.277674	-0.831819	Decrease	Female
NAGPA	0.806219	0.312787	-1.11901	Decrease	Female
CYGB	0.931503	0.125202	-1.05671	Decrease	Female
MOBP	1.08609	-0.20347	-0.882617	Decrease	Female
ZMAT1	0.99962	0.000759636	-1.00038	Decrease	Female
INHA	0.83386	0.274813	-1.10867	Decrease	Female
DCTN1	0.914392	0.153472	-1.06786	Decrease	Female
NEDD4	0.960318	0.0751262	-1.03544	Decrease	Female
ECHDC2	1.03118	-0.0655785	-0.965597	Decrease	Female
RPS28	1.02723	-0.0568835	-0.970344	Decrease	Female
D2HGDH	0.862117	0.234197	-1.09631	Decrease	Female
REEP6	0.956497	0.0819615	-1.03846	Decrease	Female
UGDH.AS1	0.998539	0.00291465	-1.00145	Decrease	Female
MTHFD1	0.849556	0.252489	-1.10205	Decrease	Female
SCNN1D	0.910946	0.159045	-1.06999	Decrease	Female
DMKN	0.822908	0.290057	-1.11296	Decrease	Female
TBC1D8B	1.09128	-0.218776	-0.872499	Decrease	Female
CPT1A	1.03685	-0.0783012	-0.958548	Decrease	Female
CAMLG	1.09729	-0.237251	-0.860039	Decrease	Female
SLU7	0.840328	0.265683	-1.10601	Decrease	Female
CCDC144B	1.12533	-0.338551	-0.786778	Decrease	Female
ADAM15	1.13037	-0.360994	-0.769378	Decrease	Female
LINC00265	0.774619	0.354293	-1.12891	Decrease	Female
VWCE	0.884365	0.200798	-1.08516	Decrease	Female
UBE2M	0.924041	0.137655	-1.0617	Decrease	Female
TELO2	0.733119	0.406035	-1.13915	Decrease	Female
VWA3A	1.08177	-0.191125	-0.890644	Decrease	Female
ITGB4	0.808823	0.309279	-1.1181	Decrease	Female
RNF31	1.00396	-0.00795855	-0.995997	Decrease	Female
FAM120B	0.795815	0.326668	-1.12248	Decrease	Female
FKBP8	0.784196	0.341917	-1.12611	Decrease	Female
RAD50	0.798492	0.323117	-1.12161	Decrease	Female
PET100	0.740358	0.39722	-1.13758	Decrease	Female
GAK	0.797381	0.324592	-1.12197	Decrease	Female
RP11.545I5.3	0.838998	0.267569	-1.10657	Decrease	Female
POMGNT1	1.08471	-0.199496	-0.885215	Decrease	Female
TCEA2	0.848779	0.253609	-1.10239	Decrease	Female
SERF1B	0.883464	0.202177	-1.08564	Decrease	Female
SLC29A4	0.971399	0.0549371	-1.02634	Decrease	Female
TXNDC15	1.00249	-0.00500514	-0.997488	Decrease	Female
PROSER3	0.888526	0.1944	-1.08293	Decrease	Female
AARSD1	1.04531	-0.0978069	-0.947503	Decrease	Female
RP11.111M22.3	1.02699	-0.0563687	-0.970623	Decrease	Female
MICALL2	1.13151	-0.366341	-0.765168	Decrease	Female
DDX55	1.03803	-0.080991	-0.957042	Decrease	Female
QARS	0.8685	0.22475	-1.09325	Decrease	Female
AZGP1	0.860851	0.236059	-1.09691	Decrease	Female
RP11.398K22.12	1.05981	-0.132903	-0.926903	Decrease	Female
SRM	0.817918	0.296914	-1.11483	Decrease	Female
MYH7B	1.00023	-0.000467154	-0.999766	Decrease	Female
RP11.1000B6.3	0.939196	0.112152	-1.05135	Decrease	Female
FBXL15	0.847015	0.256142	-1.10316	Decrease	Female
CTD.2228K2.7	0.940288	0.110281	-1.05057	Decrease	Female
RGS12	0.905809	0.167283	-1.07309	Decrease	Female
NCOA7	1.01679	-0.0344615	-0.982324	Decrease	Female
RP11.98J23.2	0.935712	0.11809	-1.0538	Decrease	Female
OLIG1	1.10043	-0.247255	-0.853178	Decrease	Female
NKAIN3	0.838228	0.268658	-1.10689	Decrease	Female
COG1	0.881842	0.204653	-1.0865	Decrease	Female
SLC27A1	0.884588	0.200457	-1.08504	Decrease	Female
CAPNS1	0.939076	0.112357	-1.05143	Decrease	Female
DDX46	1.0145	-0.0296555	-0.984842	Decrease	Female
RN7SL731P	1.08203	-0.19185	-0.890176	Decrease	Female
TMEM192	0.908806	0.162488	-1.07129	Decrease	Female
ARL2	0.953203	0.0878043	-1.04101	Decrease	Female
ANKRD9	0.901367	0.17434	-1.07571	Decrease	Female
RDH13	0.828941	0.281692	-1.11063	Decrease	Female
MYL5	0.840488	0.265456	-1.10594	Decrease	Female
MED19	0.796009	0.32641	-1.12242	Decrease	Female
SNTG1	0.823577	0.289133	-1.11271	Decrease	Female
AC107983.4	0.994685	0.0105476	-1.00523	Decrease	Female
SRRM1	0.95887	0.0777234	-1.03659	Decrease	Female
ZNHIT2	0.726283	0.414281	-1.14056	Decrease	Female
TDG	1.05317	-0.116544	-0.936621	Decrease	Female
NNT.AS1	0.911355	0.158386	-1.06974	Decrease	Female
KRT17P1	0.773025	0.356336	-1.12936	Decrease	Female
KCTD13	0.985229	0.0289149	-1.01414	Decrease	Female
SEMA6C	1.12904	-0.354859	-0.774178	Decrease	Female
RRP7BP	1.08428	-0.198274	-0.886011	Decrease	Female
AK9	1.06831	-0.154634	-0.913675	Decrease	Female
THOC2	0.898032	0.179597	-1.07763	Decrease	Female
ZBTB48	0.755859	0.378051	-1.13391	Decrease	Female
COL9A3	0.72521	0.415567	-1.14078	Decrease	Female
SNHG11	1.07041	-0.160149	-0.910261	Decrease	Female
DEGS2	0.881559	0.205085	-1.08664	Decrease	Female
CACNG8	0.897452	0.180508	-1.07796	Decrease	Female
CCHCR1	0.998247	0.00349767	-1.00174	Decrease	Female
ZNHIT1	0.958777	0.0778901	-1.03667	Decrease	Female
PCBP4	0.901679	0.173846	-1.07552	Decrease	Female
NOXA1	0.882418	0.203775	-1.08619	Decrease	Female
KLHDC9	0.753535	0.380951	-1.13449	Decrease	Female
RP11.589F5.4	1.04661	-0.100856	-0.94575	Decrease	Female
RP11.182J1.12	0.977388	0.0437859	-1.02117	Decrease	Female
PRRC2C	1.0179	-0.0368259	-0.981078	Decrease	Female
RP11.259O2.3	1.11973	-0.315615	-0.804113	Decrease	Female
RP11.252A24.2	1.02498	-0.0519913	-0.97299	Decrease	Female
UPF3A	0.977455	0.0436591	-1.02111	Decrease	Female
NECAB2	0.786857	0.338447	-1.1253	Decrease	Female
FKBP11	1.04773	-0.103508	-0.94422	Decrease	Female
ENOSF1	0.990282	0.019161	-1.00944	Decrease	Female
AC093838.4	1.13484	-0.382753	-0.752088	Decrease	Female
TTYH1	0.941567	0.108085	-1.04965	Decrease	Female
PDF	0.761719	0.370697	-1.13242	Decrease	Female
HIRIP3	0.991442	0.0169017	-1.00834	Decrease	Female
GPATCH8	1.12112	-0.321143	-0.799976	Decrease	Female
SLC16A11	0.913533	0.154865	-1.0684	Decrease	Female
CCDC78	0.863284	0.232478	-1.09576	Decrease	Female
RP11.146D12.2	0.994499	0.0109135	-1.00541	Decrease	Female
SNRNP27	0.78171	0.345145	-1.12686	Decrease	Female
SCN1B	0.866703	0.22742	-1.09412	Decrease	Female
AC004951.6	0.920526	0.143453	-1.06398	Decrease	Female
SRPK2	0.789474	0.335022	-1.1245	Decrease	Female
PPP1R35	0.831942	0.277502	-1.10944	Decrease	Female
WDR60	1.00133	-0.00266421	-0.998665	Decrease	Female
QPCTL	1.07098	-0.161655	-0.909324	Decrease	Female
GTF2IRD2B	0.94685	0.0989432	-1.04579	Decrease	Female
APLP1	0.927247	0.132329	-1.05958	Decrease	Female
PCDH9	0.858307	0.239787	-1.09809	Decrease	Female
GIGYF1	0.891297	0.190113	-1.08141	Decrease	Female
VEGFB	0.945214	0.101787	-1.047	Decrease	Female
CCDC88A	1.07176	-0.163715	-0.908041	Decrease	Female
PCDHGB2	0.814275	0.301888	-1.11616	Decrease	Female
CWF19L2	1.05954	-0.132229	-0.927307	Decrease	Female
CITED4	0.84855	0.253938	-1.10249	Decrease	Female
LMTK3	0.765182	0.366323	-1.13151	Decrease	Female
NUBP2	0.823591	0.289114	-1.1127	Decrease	Female
MRPS16	0.742339	0.394794	-1.13713	Decrease	Female
ASIC3	1.13174	-0.36744	-0.7643	Decrease	Female
FXYD7	0.915433	0.151781	-1.06721	Decrease	Female
SAC3D1	0.848453	0.254077	-1.10253	Decrease	Female
STRBP	1.04286	-0.0920808	-0.950775	Decrease	Female
WASH1	0.9785	0.0416953	-1.0202	Decrease	Female
RBMX2	0.890843	0.190817	-1.08166	Decrease	Female
CEBPZOS	1.04411	-0.0950034	-0.949108	Decrease	Female
AC007246.3	1.0663	-0.149416	-0.916885	Decrease	Female
GNRHR2	1.08178	-0.191153	-0.890626	Decrease	Female
SCARNA7	0.87201	0.219509	-1.09152	Decrease	Female
C2CD4C	0.940335	0.110202	-1.05054	Decrease	Female
CHTF18	1.09604	-0.233357	-0.862688	Decrease	Female
XIAP	0.823594	0.289109	-1.1127	Decrease	Female
IDH3G	0.881232	0.205583	-1.08681	Decrease	Female
RPL8	0.96576	0.0652809	-1.03104	Decrease	Female
PGAM5	0.937902	0.114362	-1.05226	Decrease	Female
SLC35E1	0.969757	0.0579653	-1.02772	Decrease	Female
PAX8.AS1	0.728774	0.411285	-1.14006	Decrease	Female
KIAA1328	1.09404	-0.227164	-0.866876	Decrease	Female
LINC01551	1.12311	-0.329239	-0.79387	Decrease	Female
RP11.658F2.8	1.04091	-0.0875725	-0.953334	Decrease	Female
PLXNB3	1.00121	-0.00242045	-0.998788	Decrease	Female
ARL16	1.01039	-0.0211128	-0.989276	Decrease	Female
ACAP1	1.02432	-0.050567	-0.973757	Decrease	Female
DNAAF1	1.10794	-0.272268	-0.835669	Decrease	Female
ABHD12	0.784597	0.341394	-1.12599	Decrease	Female
HK1	0.9272	0.132407	-1.05961	Decrease	Female
UCN	1.12508	-0.337497	-0.787584	Decrease	Female
MRI1	0.795756	0.326746	-1.1225	Decrease	Female
WFDC2	0.839011	0.26755	-1.10656	Decrease	Female
TMEM138	1.0841	-0.197742	-0.886356	Decrease	Female
PIGQ	0.833945	0.274694	-1.10864	Decrease	Female
LINC00957	0.873942	0.216611	-1.09055	Decrease	Female
STAG3L3	1.00379	-0.00761831	-0.996169	Decrease	Female
TTC3	0.968153	0.0609098	-1.02906	Decrease	Female
KIF17	1.04024	-0.086035	-0.954203	Decrease	Female
ZC3H8	1.13117	-0.364749	-0.766424	Decrease	Female
LUC7L3	1.12921	-0.355662	-0.773551	Decrease	Female
LFNG	0.957983	0.0793112	-1.03729	Decrease	Female
ATIC	0.779736	0.347702	-1.12744	Decrease	Female
ACAD10	0.992318	0.0151919	-1.00751	Decrease	Female
BRSK2	0.826303	0.28536	-1.11166	Decrease	Female
ANKRD24	0.896028	0.18274	-1.07877	Decrease	Female
IFITM10	0.750434	0.384807	-1.13524	Decrease	Female
TCF25	0.950855	0.0919399	-1.0428	Decrease	Female
NSRP1	1.05362	-0.117645	-0.935974	Decrease	Female
GALE	0.744487	0.392155	-1.13664	Decrease	Female
PRRC2A	0.901069	0.17481	-1.07588	Decrease	Female
BRD9	0.975103	0.0480612	-1.02316	Decrease	Female
TGFBR3L	0.807185	0.311488	-1.11867	Decrease	Female
MGMT	0.777522	0.35056	-1.12808	Decrease	Female
RBM25	0.986725	0.0260405	-1.01277	Decrease	Female
WDR13	0.889361	0.193111	-1.08247	Decrease	Female
TSSC4	0.851849	0.249179	-1.10103	Decrease	Female
SLC26A10	1.07465	-0.17147	-0.903178	Decrease	Female
SPACA6	1.08235	-0.192765	-0.889584	Decrease	Female
OGFR	0.858774	0.239104	-1.09788	Decrease	Female
NABP2	1.09601	-0.233248	-0.862762	Decrease	Female
NT5M	0.845653	0.258095	-1.10375	Decrease	Female
MTFMT	0.843573	0.261067	-1.10464	Decrease	Female
MPV17L	0.878478	0.209765	-1.08824	Decrease	Female
GPR155	0.886753	0.197132	-1.08389	Decrease	Female
PNMA3	0.730509	0.409192	-1.1397	Decrease	Female
AC005943.2	1.04364	-0.0939015	-0.949737	Decrease	Female
PDCD7	1.13507	-0.383904	-0.751162	Decrease	Female
NTHL1	0.752052	0.382798	-1.13485	Decrease	Female
SDHAF4	0.995779	0.00838939	-1.00417	Decrease	Female
SNAI3.AS1	0.784888	0.341015	-1.1259	Decrease	Female
ABCF1	0.947981	0.0969722	-1.04495	Decrease	Female
DUSP8	0.870209	0.222202	-1.09241	Decrease	Female
TBCD	1.09279	-0.223362	-0.869432	Decrease	Female
ARID4B	0.879995	0.207463	-1.08746	Decrease	Female
BOLA2B	0.811208	0.306054	-1.11726	Decrease	Female
NANOS3	1.01759	-0.0361706	-0.981424	Decrease	Female
CHCHD5	0.84114	0.26453	-1.10567	Decrease	Female
GBA	0.900845	0.175164	-1.07601	Decrease	Female
AMH	0.994731	0.0104556	-1.00519	Decrease	Female
ACBD4	0.969801	0.0578826	-1.02768	Decrease	Female
ABHD11	1.02742	-0.057299	-0.970119	Decrease	Female
CALY	0.894407	0.185274	-1.07968	Decrease	Female
DUXAP9	0.904582	0.169238	-1.07382	Decrease	Female
ITFG2	0.740083	0.397558	-1.13764	Decrease	Female
RP11.697E2.7	1.12111	-0.321115	-0.799997	Decrease	Female
RP11.599B13.6	0.965161	0.066372	-1.03153	Decrease	Female
NEBL.AS1	0.816986	0.29819	-1.11518	Decrease	Female
NAT6	0.78856	0.33622	-1.12478	Decrease	Female
RPRML	0.945107	0.101972	-1.04708	Decrease	Female
LDB3	0.867506	0.226229	-1.09373	Decrease	Female
SDC4	0.951045	0.0916065	-1.04265	Decrease	Female
ARRDC1	0.931064	0.12594	-1.057	Decrease	Female
CMTM5	0.767556	0.363312	-1.13087	Decrease	Female
RHBDD3	0.73175	0.407692	-1.13944	Decrease	Female
MLST8	0.840002	0.266146	-1.10615	Decrease	Female
UBXN11	0.924733	0.136509	-1.06124	Decrease	Female
TTF1	0.888288	0.194767	-1.08306	Decrease	Female
ELAVL3	0.747974	0.387854	-1.13583	Decrease	Female
CCDC57	1.01396	-0.0285302	-0.98543	Decrease	Female
RAB30.AS1	0.812757	0.303952	-1.11671	Decrease	Female
PRKRIP1	0.923846	0.137978	-1.06182	Decrease	Female
CYP2D7	0.921883	0.141221	-1.0631	Decrease	Female
HEXDC	1.05171	-0.113034	-0.93868	Decrease	Female
TMEM88B	0.838667	0.268037	-1.1067	Decrease	Female
SLC4A7	1.08109	-0.18921	-0.891879	Decrease	Female
MYCBP2	1.08425	-0.198179	-0.886073	Decrease	Female
MT1H	1.0331	-0.0698537	-0.963242	Decrease	Female
ERICH1	0.939577	0.111501	-1.05108	Decrease	Female
COG7	1.03636	-0.0771851	-0.959171	Decrease	Female
P4HTM	0.732039	0.407343	-1.13938	Decrease	Female
ABCB9	0.73497	0.403789	-1.13876	Decrease	Female
MFN1	1.10102	-0.24916	-0.851862	Decrease	Female
HDAC6	0.986986	0.0255385	-1.01252	Decrease	Female
TMEM179	1.01151	-0.0234247	-0.988082	Decrease	Female
CIRBP	0.863676	0.2319	-1.09558	Decrease	Female
NIFK.AS1	1.11972	-0.315574	-0.804144	Decrease	Female
NOL3	1.12628	-0.342638	-0.783642	Decrease	Female
LENG8.AS1	0.9865	0.0264738	-1.01297	Decrease	Female
RP11.195F19.5	0.977674	0.0432487	-1.02092	Decrease	Female
FASTK	1.10112	-0.249475	-0.851644	Decrease	Female
ZC3H13	0.986246	0.0269628	-1.01321	Decrease	Female
LRFN4	0.780059	0.347284	-1.12734	Decrease	Female
GOLGA2	0.838215	0.268676	-1.10689	Decrease	Female
LY6H	0.872022	0.219491	-1.09151	Decrease	Female
PCSK4	1.10157	-0.250939	-0.850631	Decrease	Female
MAN1A2	1.0131	-0.0267364	-0.986364	Decrease	Female
MAD1L1	0.827381	0.283863	-1.11124	Decrease	Female
RBM28	1.00435	-0.00875352	-0.995595	Decrease	Female
SFXN1	0.829183	0.281356	-1.11054	Decrease	Female
LRRC73	0.736078	0.402442	-1.13852	Decrease	Female
RASEF	0.932913	0.122826	-1.05574	Decrease	Female
RP4.669L17.10	0.828254	0.282649	-1.1109	Decrease	Female
MLLT4	1.05669	-0.125154	-0.931532	Decrease	Female
DNAJC4	0.823434	0.28933	-1.11276	Decrease	Female
2004-09-01	0.746883	0.389202	-1.13608	Decrease	Female
BDP1	1.00504	-0.0101504	-0.994886	Decrease	Female
SCPEP1	1.05398	-0.118535	-0.93545	Decrease	Female
RNF208	0.971748	0.0542923	-1.02604	Decrease	Female
ZNF436.AS1	1.13227	-0.369997	-0.762275	Decrease	Female
MESP1	0.866952	0.227051	-1.094	Decrease	Female
PAPLN	1.02294	-0.0475777	-0.975362	Decrease	Female
PRR22	0.963468	0.0694436	-1.03291	Decrease	Female
HAGHL	1.07413	-0.170066	-0.904062	Decrease	Female
GPATCH4	0.742912	0.394091	-1.137	Decrease	Female
SCAND1	0.749804	0.385588	-1.13539	Decrease	Female
BCLAF1	0.81458	0.301473	-1.11605	Decrease	Female
C1QL1	1.10943	-0.277445	-0.831982	Decrease	Female
METTL2B	0.842915	0.262005	-1.10492	Decrease	Female
DDX24	0.965357	0.0660139	-1.03137	Decrease	Female
ZNF789	1.0827	-0.193747	-0.88895	Decrease	Female
DYX1C1.CCPG1	0.964102	0.0682945	-1.0324	Decrease	Female
ANKRD36	1.02536	-0.0528169	-0.972545	Decrease	Female
CCDC59	1.04731	-0.102508	-0.944798	Decrease	Female
ADD2	0.763471	0.368487	-1.13196	Decrease	Female
NEMF	1.0062	-0.0125103	-0.993686	Decrease	Female
TRAPPC6A	0.752192	0.382623	-1.13482	Decrease	Female
SGSH	0.787961	0.337003	-1.12496	Decrease	Female
LIME1	1.08191	-0.191531	-0.890382	Decrease	Female
ATP6AP1L	0.993176	0.0135111	-1.00669	Decrease	Female
TMEM147.AS1	0.923501	0.138549	-1.06205	Decrease	Female
RP11.156P1.3	1.08295	-0.194479	-0.888475	Decrease	Female
PDZD7	0.819751	0.294401	-1.11415	Decrease	Female
GATAD1	1.03695	-0.078523	-0.958424	Decrease	Female
PTPRN	0.810048	0.307624	-1.11767	Decrease	Female
SLC39A4	0.797691	0.32418	-1.12187	Decrease	Female
SLC25A10	0.778306	0.349549	-1.12785	Decrease	Female
METAP2	1.06319	-0.141433	-0.921754	Decrease	Female
UBE2Q2P1	0.784259	0.341835	-1.12609	Decrease	Female
ANKS3	0.796547	0.325698	-1.12224	Decrease	Female
AC079776.2	0.871182	0.220748	-1.09193	Decrease	Female
DDX41	0.728373	0.411768	-1.14014	Decrease	Female
CCDC66	1.07265	-0.166104	-0.906548	Decrease	Female
TREX1	0.85109	0.250276	-1.10137	Decrease	Female
TMEM134	0.733415	0.405677	-1.13909	Decrease	Female
SNRNP70	0.781045	0.346007	-1.12705	Decrease	Female
PYCRL	0.778841	0.348858	-1.1277	Decrease	Female
LRRC75B	0.934604	0.119969	-1.05457	Decrease	Female
TPT1.AS1	0.830477	0.279551	-1.11003	Decrease	Female
DUSP15	0.7657	0.365667	-1.13137	Decrease	Female
SPRYD7	0.977728	0.0431478	-1.02088	Decrease	Female
SFSWAP	1.13429	-0.379957	-0.754333	Decrease	Female
SEPT7P2	0.852136	0.248764	-1.1009	Decrease	Female
AHI1	1.06864	-0.155489	-0.913148	Decrease	Female
RFPL1S	0.73273	0.406506	-1.13924	Decrease	Female
HAPLN2	0.979941	0.038978	-1.01892	Decrease	Female
TARBP1	0.792694	0.33079	-1.12348	Decrease	Female
NMRAL1	0.855382	0.244053	-1.09944	Decrease	Female
ATP5B	0.739141	0.398708	-1.13785	Decrease	Female
FAM133CP	1.08046	-0.187453	-0.893008	Decrease	Female
CPSF1	0.973012	0.0519505	-1.02496	Decrease	Female
RP11.498P14.3	1.06128	-0.136604	-0.924676	Decrease	Female
WNT3	0.869411	0.223393	-1.0928	Decrease	Female
GP1BB	1.02477	-0.05154	-0.973233	Decrease	Female
KLHL24	1.02052	-0.0423791	-0.978137	Decrease	Female
TERF1	0.788463	0.336347	-1.12481	Decrease	Female
SHC2	1.01853	-0.0381482	-0.98038	Decrease	Female
RP11.346D14.1	1.11121	-0.283726	-0.827479	Decrease	Female
RP11.506M12.1	1.08682	-0.205608	-0.881215	Decrease	Female
PPP1R3E	0.962608	0.0709999	-1.03361	Decrease	Female
GIPC1	0.787879	0.337111	-1.12499	Decrease	Female
THEM6	0.818064	0.296715	-1.11478	Decrease	Female
TMEM175	0.732252	0.407085	-1.13934	Decrease	Female
NME3	0.990571	0.0185988	-1.00917	Decrease	Female
DYNC1I2	1.12964	-0.357634	-0.772011	Decrease	Female
GPS1	0.993595	0.012689	-1.00628	Decrease	Female
NPIPA2	0.731318	0.408215	-1.13953	Decrease	Female
WDPCP	0.945218	0.10178	-1.047	Decrease	Female
WAC.AS1	0.843701	0.260884	-1.10459	Decrease	Female
MYO6	1.10193	-0.252097	-0.849828	Decrease	Female
ANKRD36C	1.05645	-0.124571	-0.931878	Decrease	Female
AC092669.3	1.12985	-0.358596	-0.771258	Decrease	Female
PCAT6	0.880275	0.207038	-1.08731	Decrease	Female
PAQR6	0.905233	0.168202	-1.07343	Decrease	Female
PMF1	1.06446	-0.144685	-0.919776	Decrease	Female
TMEM45A	1.10763	-0.27122	-0.836414	Decrease	Female
PPP1R16A	0.882304	0.203949	-1.08625	Decrease	Female
DGCR6L	0.812258	0.30463	-1.11689	Decrease	Female
RPL28	1.05987	-0.133055	-0.926811	Decrease	Female
NUMA1	1.03545	-0.0751388	-0.960311	Decrease	Female
LMF1	0.813036	0.303573	-1.11661	Decrease	Female
SOX18	0.779012	0.348638	-1.12765	Decrease	Female
SULT1A1	0.860879	0.236017	-1.0969	Decrease	Female
UPF3B	1.05475	-0.12039	-0.934355	Decrease	Female
TP53INP2	0.969205	0.0589799	-1.02818	Decrease	Female
PRR36	0.750084	0.385241	-1.13533	Decrease	Female
LRWD1	1.04626	-0.100032	-0.946224	Decrease	Female
GNG13	0.849361	0.25277	-1.10213	Decrease	Female
NEIL1	1.12058	-0.318993	-0.801588	Decrease	Female
CRLF1	0.835968	0.271848	-1.10782	Decrease	Female
ANKRD26	1.09145	-0.219305	-0.872146	Decrease	Female
MFI2.AS1	1.0409	-0.0875695	-0.953335	Decrease	Female
ANXA11	0.873331	0.217529	-1.09086	Decrease	Female
TRAPPC12	0.92554	0.13517	-1.06071	Decrease	Female
SON	0.846309	0.257155	-1.10346	Decrease	Female
FTCD	1.00603	-0.0121707	-0.993859	Decrease	Female
YDJC	0.84116	0.264502	-1.10566	Decrease	Female
AGPAT2	0.949884	0.0936444	-1.04353	Decrease	Female
SMARCA4	0.73764	0.400541	-1.13818	Decrease	Female
GOLGA8A	0.884792	0.200144	-1.08494	Decrease	Female
CCDC24	0.741797	0.395459	-1.13726	Decrease	Female
TPMT	1.01544	-0.0316328	-0.983808	Decrease	Female
LIN37	0.791998	0.331706	-1.1237	Decrease	Female
RP11.673C5.1	0.98739	0.0247602	-1.01215	Decrease	Female
IDUA	0.882427	0.203762	-1.08619	Decrease	Female
LTBP4	0.833077	0.275912	-1.10899	Decrease	Female
EHMT2	0.966747	0.0634806	-1.03023	Decrease	Female
CRTC1	0.732683	0.406564	-1.13925	Decrease	Female
TNFAIP8L1	1.1228	-0.327987	-0.794817	Decrease	Female
ARL6IP4	0.815462	0.30027	-1.11573	Decrease	Female
WDR54	0.905846	0.167224	-1.07307	Decrease	Female
CHKB	1.06462	-0.145084	-0.919533	Decrease	Female
GOLGA8B	0.806087	0.312964	-1.11905	Decrease	Female
ANKRD17	0.975653	0.0470338	-1.02269	Decrease	Female
DEAF1	0.905811	0.167281	-1.07309	Decrease	Female
MIB2	1.07765	-0.179665	-0.897989	Decrease	Female
ADHFE1	0.778214	0.349668	-1.12788	Decrease	Female
MORN1	0.882245	0.204039	-1.08628	Decrease	Female
ROBO3	1.06137	-0.13684	-0.924533	Decrease	Female
MROH7	0.843085	0.261763	-1.10485	Decrease	Female
PHIP	0.862115	0.2342	-1.09632	Decrease	Female
KNOP1	1.10158	-0.25097	-0.85061	Decrease	Female
TRAF3IP1	0.924056	0.137631	-1.06169	Decrease	Female
NEU4	0.92084	0.142937	-1.06378	Decrease	Female
PRR18	0.821632	0.291815	-1.11345	Decrease	Female
ASPDH	0.86673	0.22738	-1.09411	Decrease	Female
CCDC112	0.979207	0.0403639	-1.01957	Decrease	Female
ACY1	0.803437	0.31652	-1.11996	Decrease	Female
RP11.505K9.1	0.86041	0.236707	-1.09712	Decrease	Female
DGCR5	1.00183	-0.00367072	-0.99816	Decrease	Female
PDE6B	0.898812	0.17837	-1.07718	Decrease	Female
MRPL41	0.790855	0.333209	-1.12406	Decrease	Female
CCDC91	0.941304	0.108537	-1.04984	Decrease	Female
HSD11B1L	0.910045	0.160497	-1.07054	Decrease	Female
CARNS1	0.775739	0.352854	-1.12859	Decrease	Female
KLHL35	0.737975	0.400132	-1.13811	Decrease	Female
CTD.2020K17.1	1.03008	-0.0631453	-0.966931	Decrease	Female
ORC6	1.00876	-0.0177637	-0.991	Decrease	Female
ZNF219	1.13487	-0.382899	-0.75197	Decrease	Female
BSCL2	0.734216	0.404705	-1.13892	Decrease	Female
PDCD6IPP2	0.807577	0.31096	-1.11854	Decrease	Female
TOX2	0.875916	0.213639	-1.08956	Decrease	Female
NFATC2IP	0.806326	0.312644	-1.11897	Decrease	Female
TST	0.800643	0.320253	-1.1209	Decrease	Female
NKTR	1.03829	-0.0815767	-0.956713	Decrease	Female
CACNA1A	0.867332	0.226487	-1.09382	Decrease	Female
ZNF653	0.880899	0.20609	-1.08699	Decrease	Female
PDDC1	0.726877	0.413567	-1.14044	Decrease	Female
MT.ATP8	1.12847	-0.352308	-0.776164	Decrease	Female
ZDHHC11B	0.990213	0.0192948	-1.00951	Decrease	Female
ZNF554	0.764755	0.366864	-1.13162	Decrease	Female
CCDC25	0.74161	0.395687	-1.1373	Decrease	Female
SLC25A45	0.857174	0.241442	-1.09862	Decrease	Female
GSTZ1	0.816765	0.298492	-1.11526	Decrease	Female
MUC20	1.13157	-0.366644	-0.764929	Decrease	Female
CAMSAP3	0.836789	0.27069	-1.10748	Decrease	Female
COL7A1	1.12782	-0.349402	-0.778419	Decrease	Female
BLOC1S6	0.849593	0.252436	-1.10203	Decrease	Female
ALKBH6	0.839046	0.2675	-1.10655	Decrease	Female
LCNL1	1.08115	-0.189375	-0.891772	Decrease	Female
ERMARD	0.945604	0.101111	-1.04671	Decrease	Female
LRSAM1	0.820269	0.29369	-1.11396	Decrease	Female
RP11.111H13.1	0.848726	0.253684	-1.10241	Decrease	Female
AAK1	0.906193	0.166669	-1.07286	Decrease	Female
PDIA2	0.972992	0.0519883	-1.02498	Decrease	Female
CCDC85B	0.774819	0.354036	-1.12886	Decrease	Female
NPIPB4	0.74526	0.391203	-1.13646	Decrease	Female
DUS1L	1.06573	-0.147942	-0.917787	Decrease	Female
EXOSC6	0.86607	0.228359	-1.09443	Decrease	Female
CCDC189	0.974956	0.0483352	-1.02329	Decrease	Female
LUC7L	0.842166	0.263071	-1.10524	Decrease	Female
FAAP20	1.05452	-0.119846	-0.934676	Decrease	Female
WRAP53	1.03515	-0.0744645	-0.960686	Decrease	Female
SNHG9	1.0114	-0.0232085	-0.988194	Decrease	Female
SELO	0.747564	0.38836	-1.13592	Decrease	Female
PNKP	0.756718	0.376977	-1.1337	Decrease	Female
NSRP1P1	1.1215	-0.322696	-0.798809	Decrease	Female
RHBDL1	0.814447	0.301654	-1.1161	Decrease	Female
ZBTB8OS	0.998446	0.00310158	-1.00155	Decrease	Female
MEG3	1.136	-0.388757	-0.747243	Decrease	Female
FAM153A	0.80495	0.314491	-1.11944	Decrease	Female
KIF3A	0.789513	0.334971	-1.12448	Decrease	Female
SUZ12P1	1.04088	-0.087516	-0.953366	Decrease	Female
TMEM91	1.08708	-0.206349	-0.880728	Decrease	Female
VPS33B	0.781606	0.345281	-1.12689	Decrease	Female
RP11.617F23.1	0.893004	0.18746	-1.08046	Decrease	Female
P2RX6	0.836167	0.271567	-1.10773	Decrease	Female
NCLN	1.00787	-0.0159391	-0.991935	Decrease	Female
NPEPL1	0.953603	0.0870974	-1.0407	Decrease	Female
DIS3L2	0.917227	0.148857	-1.06608	Decrease	Female
MED22	0.794452	0.32847	-1.12292	Decrease	Female
RP11.105C19.1	1.12257	-0.327041	-0.795533	Decrease	Female
IGFBP6	0.764099	0.367694	-1.13179	Decrease	Female
TAF10	1.12245	-0.326544	-0.795908	Decrease	Female
MRTO4	0.767013	0.364002	-1.13101	Decrease	Female
NPM2	0.849091	0.253158	-1.10225	Decrease	Female
AC138430.4	0.786896	0.338396	-1.12529	Decrease	Female
FAM174B	0.949733	0.0939088	-1.04364	Decrease	Female
PCNXL2	1.00718	-0.0145167	-0.992663	Decrease	Female
FSIP2	0.955113	0.084421	-1.03953	Decrease	Female
RP11.1055B8.4	0.859395	0.238194	-1.09759	Decrease	Female
LINC00092	0.844703	0.259453	-1.10416	Decrease	Female
LGI4	0.866566	0.227624	-1.09419	Decrease	Female
ACOX1	0.816377	0.299022	-1.1154	Decrease	Female
TARS2	0.81335	0.303147	-1.1165	Decrease	Female
COX7A1	0.81626	0.299182	-1.11544	Decrease	Female
UTP11L	0.938621	0.113135	-1.05176	Decrease	Female
RNVU1.7	0.743372	0.393525	-1.1369	Decrease	Female
RP11.81A22.5	1.01408	-0.0287857	-0.985296	Decrease	Female
MAP7D2	0.818361	0.296308	-1.11467	Decrease	Female
KIFC2	0.751129	0.383944	-1.13507	Decrease	Female
FAM50B	0.936288	0.117111	-1.0534	Decrease	Female
COQ4	0.914964	0.152543	-1.06751	Decrease	Female
TMEM191A	0.82946	0.280969	-1.11043	Decrease	Female
SLC2A4RG	0.850761	0.250751	-1.10151	Decrease	Female
TMEM129	0.946503	0.0995472	-1.04605	Decrease	Female
COL9A2	1.10747	-0.270669	-0.836805	Decrease	Female
CERCAM	0.965845	0.0651272	-1.03097	Decrease	Female
ZFPM1	0.71949	0.4224	-1.14189	Decrease	Female
RASA4B	1.08264	-0.193578	-0.889059	Decrease	Female
NSUN5P2	0.858133	0.240042	-1.09817	Decrease	Female
MDM4	1.13548	-0.386041	-0.749439	Decrease	Female
AP000223.42	0.85179	0.249265	-1.10105	Decrease	Female
CHD8	1.12275	-0.327746	-0.795	Decrease	Female
CCDC144A	1.11498	-0.297451	-0.817526	Decrease	Female
HBB	0.823263	0.289566	-1.11283	Decrease	Female
NDUFA3	0.872054	0.219444	-1.0915	Decrease	Female
EPHB6	1.12082	-0.319933	-0.800883	Decrease	Female
MT.ND6	0.906375	0.16638	-1.07275	Decrease	Female
CTD.2015H6.3	1.04941	-0.107511	-0.941901	Decrease	Female
RABL2A	0.951011	0.0916665	-1.04268	Decrease	Female
EFS	0.809441	0.308444	-1.11789	Decrease	Female
PPHLN1	1.01483	-0.0303456	-0.984482	Decrease	Female
DPP7	1.08028	-0.186949	-0.893332	Decrease	Female
LRRC23	0.776563	0.351794	-1.12836	Decrease	Female
IZUMO4	1.03077	-0.0646699	-0.966095	Decrease	Female
FAM3A	0.761677	0.370751	-1.13243	Decrease	Female
KIF16B	1.04507	-0.0972491	-0.947823	Decrease	Female
CTSA	-1.07413	0.170072	0.904058	Increase	Female
IL32	-1.05704	0.126021	0.931016	Increase	Female
MYOM2	-1.06413	0.143843	0.920289	Increase	Female
MAF1	-0.747095	-0.388939	1.13603	Increase	Female
CHN2	-0.992579	-0.0146812	1.00726	Increase	Female
NELFCD	-1.00711	0.0143824	0.992731	Increase	Female
ZCCHC8	-0.892233	-0.188659	1.08089	Increase	Female
MARS	-0.89376	-0.186283	1.08004	Increase	Female
MT1A	-1.11056	0.281415	0.82914	Increase	Female
MLKL	-0.854423	-0.245447	1.09987	Increase	Female
NOP2	-0.779975	-0.347392	1.12737	Increase	Female
PRPF3	-1.00433	0.00871812	0.995612	Increase	Female
RPS28P7	-1.06017	0.133827	0.926348	Increase	Female
WASH4P	-1.01326	0.0270738	0.986188	Increase	Female
GRAMD1C	-1.06376	0.142889	0.92087	Increase	Female
KCNE4	-0.906721	-0.165827	1.07255	Increase	Female
C1QTNF5	-1.01228	0.025021	0.987255	Increase	Female
AC005562.1	-1.07362	0.168691	0.904925	Increase	Female
SHKBP1	-1.04769	0.103422	0.94427	Increase	Female
SLC39A11	-0.809552	-0.308295	1.11785	Increase	Female
PLP2	-1.09216	0.221451	0.870712	Increase	Female
FAM169A	-1.13281	0.372616	0.760195	Increase	Female
PLOD1	-0.920352	-0.14374	1.06409	Increase	Female
INPP5D	-0.931118	-0.12585	1.05697	Increase	Female
APOLD1	-1.08163	0.19073	0.890899	Increase	Female
GALC	-1.11927	0.313811	0.805457	Increase	Female
DROSHA	-1.06949	0.15772	0.911768	Increase	Female
TXNDC11	-1.02923	0.0612714	0.967955	Increase	Female
FNIP2	-1.08421	0.198053	0.886154	Increase	Female
MERTK	-0.970054	-0.0574178	1.02747	Increase	Female
PLXDC1	-0.975479	-0.0473599	1.02284	Increase	Female
RP11.597D13.7	-0.889785	-0.192455	1.08224	Increase	Female
TRAF3IP2	-1.07581	0.174611	0.901195	Increase	Female
RBM4B	-0.939051	-0.1124	1.05145	Increase	Female
PRDX1	-1.11425	0.294773	0.81948	Increase	Female
DENND5A	-1.13828	0.401099	0.737182	Increase	Female
ATP6V0E1	-1.00294	0.00590279	0.997036	Increase	Female
GAB1	-0.962232	-0.0716788	1.03391	Increase	Female
CREM	-1.0619	0.138182	0.923723	Increase	Female
STEAP2	-0.937113	-0.115708	1.05282	Increase	Female
LYZ	-0.82082	-0.292933	1.11375	Increase	Female
ZNF32	-0.997803	-0.00438055	1.00218	Increase	Female
ANKRD27	-1.13989	0.41029	0.729599	Increase	Female
ZFYVE19	-1.05684	0.125528	0.931309	Increase	Female
UBE2Z	-1.13052	0.361695	0.768828	Increase	Female
TM9SF3	-1.13864	0.403121	0.73552	Increase	Female
TRIM25	-0.990529	-0.0186798	1.00921	Increase	Female
FANCL	-1.0727	0.166242	0.906461	Increase	Female
NUDT4	-1.14053	0.414069	0.726459	Increase	Female
WAS	-0.897044	-0.181148	1.07819	Increase	Female
PCMTD2	-1.03178	0.0669318	0.964853	Increase	Female
PDCD4	-0.954324	-0.0858203	1.04014	Increase	Female
CTC1	-1.04969	0.108171	0.941517	Increase	Female
SBNO2	-0.778033	-0.349901	1.12793	Increase	Female
SPRED1	-1.01167	0.0237618	0.987907	Increase	Female
MTIF3	-1.13249	0.371043	0.761445	Increase	Female
SZRD1	-0.945397	-0.101468	1.04687	Increase	Female
TBC1D4	-0.977051	-0.0444174	1.02147	Increase	Female
PTPN12	-0.985472	-0.0284492	1.01392	Increase	Female
ADIPOR2	-0.904528	-0.169324	1.07385	Increase	Female
ZNF664	-0.916401	-0.150205	1.06661	Increase	Female
PAQR3	-1.13538	0.385539	0.749844	Increase	Female
UBE2J1	-1.05764	0.127502	0.930134	Increase	Female
PBX2	-1.0651	0.146333	0.918771	Increase	Female
CFB	-0.87393	-0.216628	1.09056	Increase	Female
RPS24	-1.042	0.0900958	0.951903	Increase	Female
FOSL2	-0.997136	-0.0057045	1.00284	Increase	Female
HSD17B6	-1.03681	0.0782039	0.958602	Increase	Female
RHOC	-1.07759	0.179477	0.898108	Increase	Female
SLC25A39	-1.00202	0.00404242	0.997973	Increase	Female
CBX5	-1.12829	0.351494	0.776796	Increase	Female
DLC1	-0.978288	-0.0420941	1.02038	Increase	Female
MICAL1	-0.79623	-0.326119	1.12235	Increase	Female
FKBP5	-1.01948	0.0401626	0.979314	Increase	Female
FAM63A	-0.89613	-0.18258	1.07871	Increase	Female
SMARCD1	-0.966031	-0.0647873	1.03082	Increase	Female
IL18BP	-1.10395	0.258768	0.845182	Increase	Female
JDP2	-0.92889	-0.129586	1.05848	Increase	Female
ATOH8	-0.88153	-0.205129	1.08666	Increase	Female
SS18	-1.12379	0.332057	0.791731	Increase	Female
CMTM3	-0.814097	-0.30213	1.11623	Increase	Female
PCBP1	-1.01419	0.0290106	0.985179	Increase	Female
CELSR3	-0.909339	-0.161631	1.07097	Increase	Female
SEPP1	-1.02327	0.0482994	0.974975	Increase	Female
SLC35F3	-1.00455	0.00915318	0.995392	Increase	Female
CD63	-1.13042	0.361199	0.769217	Increase	Female
RAC2	-0.942964	-0.105678	1.04864	Increase	Female
ECE1	-1.05546	0.122146	0.933317	Increase	Female
PPARD	-0.997759	-0.00446709	1.00223	Increase	Female
TUBA1C	-0.834786	-0.273512	1.1083	Increase	Female
LY86	-0.913138	-0.155505	1.06864	Increase	Female
RXRA	-0.937347	-0.115309	1.05266	Increase	Female
PLCB2	-0.763105	-0.368949	1.13205	Increase	Female
NFASC	-1.0568	0.125433	0.931366	Increase	Female
RFX4	-1.11496	0.297378	0.81758	Increase	Female
TMEM214	-0.929344	-0.128825	1.05817	Increase	Female
ZBTB33	-1.11802	0.308954	0.809064	Increase	Female
POMT1	-1.02033	0.0419761	0.978351	Increase	Female
CCDC85A	-1.09948	0.244201	0.855281	Increase	Female
ATP1B3	-1.00658	0.0132875	0.99329	Increase	Female
MOB1A	-1.04172	0.089452	0.952269	Increase	Female
RBM4	-0.936288	-0.117111	1.0534	Increase	Female
MCL1	-1.02399	0.0498354	0.974151	Increase	Female
RPS4X	-1.10957	0.277936	0.831632	Increase	Female
TVP23B	-1.09959	0.244532	0.855053	Increase	Female
SPTSSA	-0.976039	-0.0463124	1.02235	Increase	Female
RASSF2	-0.780433	-0.3468	1.12723	Increase	Female
SAAL1	-1.09237	0.222085	0.870288	Increase	Female
SACM1L	-1.1267	0.344449	0.782247	Increase	Female
SLC37A3	-1.10633	0.266764	0.839566	Increase	Female
SRRD	-1.11357	0.292262	0.821307	Increase	Female
MAPRE1	-1.01586	0.0325227	0.983342	Increase	Female
MAZ	-0.979404	-0.0399916	1.0194	Increase	Female
ASAP3	-1.07533	0.173331	0.902004	Increase	Female
RIN2	-0.984836	-0.0296679	1.0145	Increase	Female
GANAB	-1.12878	0.353718	0.775067	Increase	Female
ARNTL	-0.930392	-0.127069	1.05746	Increase	Female
LGALS8	-1.1044	0.260271	0.844131	Increase	Female
IFITM1	-0.918408	-0.146927	1.06534	Increase	Female
IRF2BPL	-1.03095	0.0650841	0.965868	Increase	Female
FKBP10	-1.00027	0.000536366	0.999732	Increase	Female
PPP1CC	-1.0266	0.0555102	0.971089	Increase	Female
PLSCR1	-1.02702	0.0564307	0.97059	Increase	Female
CBX1	-1.12172	0.323562	0.798157	Increase	Female
MT1L	-0.996942	-0.006089	1.00303	Increase	Female
FBXW11	-1.11451	0.295728	0.818784	Increase	Female
S100A6	-0.819098	-0.295298	1.1144	Increase	Female
PCGF5	-1.10023	0.246617	0.853618	Increase	Female
NOL4L	-1.10479	0.261566	0.843223	Increase	Female
IQSEC3	-0.892508	-0.188232	1.08074	Increase	Female
F11R	-0.880091	-0.207318	1.08741	Increase	Female
TJP2	-1.09366	0.226008	0.867654	Increase	Female
MS4A7	-0.919512	-0.145119	1.06463	Increase	Female
IFITM2	-1.03257	0.0686909	0.963884	Increase	Female
POLR3GL	-1.11592	0.300955	0.81496	Increase	Female
DEGS1	-1.03843	0.0818961	0.956534	Increase	Female
ABHD16A	-1.13887	0.404421	0.73445	Increase	Female
KLF13	-0.768898	-0.361605	1.1305	Increase	Female
EPB41L2	-1.07883	0.182899	0.895926	Increase	Female
IER5	-1.11003	0.279547	0.830479	Increase	Female
CSF1R	-0.835202	-0.272926	1.10813	Increase	Female
ENTHD2	-0.815855	-0.299735	1.11559	Increase	Female
PLXNB1	-0.821016	-0.292663	1.11368	Increase	Female
FAM188A	-1.11928	0.313847	0.805431	Increase	Female
CD55	-1.07279	0.166483	0.90631	Increase	Female
SIRT2	-1.0054	0.0108873	0.994512	Increase	Female
ITIH5	-0.766937	-0.364097	1.13103	Increase	Female
ADGRL2	-0.968534	-0.0602118	1.02875	Increase	Female
PHC2	-1.02612	0.0544739	0.97165	Increase	Female
KLK6	-1.12272	0.327623	0.795093	Increase	Female
2008-09-01	-1.10045	0.247324	0.85313	Increase	Female
CPEB2	-1.05777	0.127822	0.929943	Increase	Female
SMG1P7	-0.774171	-0.354868	1.12904	Increase	Female
SMG6	-0.897757	-0.180028	1.07779	Increase	Female
C1QC	-1.02218	0.0459432	0.976237	Increase	Female
QKI	-1.07528	0.173185	0.902096	Increase	Female
RPS27L	-0.848256	-0.25436	1.10262	Increase	Female
JAM2	-0.981985	-0.0351063	1.01709	Increase	Female
GYPC	-0.929118	-0.129204	1.05832	Increase	Female
SP110	-0.993612	-0.0126566	1.00627	Increase	Female
VPS26A	-1.0853	0.201205	0.884099	Increase	Female
PARP14	-1.02188	0.0452929	0.976584	Increase	Female
RNF145	-0.77874	-0.348988	1.12773	Increase	Female
PML	-1.13455	0.381261	0.753287	Increase	Female
DPP3	-1.06741	0.152282	0.915125	Increase	Female
ASF1A	-1.10644	0.267138	0.839302	Increase	Female
SDC2	-1.07681	0.177359	0.899454	Increase	Female
TNPO1	-1.00466	0.00937895	0.995278	Increase	Female
EHMT1	-1.02419	0.0502796	0.973912	Increase	Female
ATP2B4	-1.13248	0.371002	0.761478	Increase	Female
ALG5	-1.06121	0.136438	0.924776	Increase	Female
ITSN2	-0.841563	-0.26393	1.10549	Increase	Female
N4BP2L1	-0.822177	-0.291064	1.11324	Increase	Female
VPS13C	-0.981219	-0.0365596	1.01778	Increase	Female
HAT1	-1.06272	0.140246	0.922474	Increase	Female
ZHX3	-1.10357	0.257505	0.846065	Increase	Female
CCT3	-1.09297	0.223886	0.86908	Increase	Female
ANO6	-1.03827	0.0815227	0.956743	Increase	Female
ZSCAN26	-1.0493	0.107241	0.942058	Increase	Female
ACAP2	-1.07051	0.160424	0.91009	Increase	Female
RHBDF1	-1.03076	0.0646633	0.966099	Increase	Female
MBD2	-0.886022	-0.198256	1.08428	Increase	Female
EXD2	-1.08635	0.204226	0.882122	Increase	Female
RNVU1.18	-0.865849	-0.228686	1.09454	Increase	Female
MORC2	-1.09626	0.234039	0.862225	Increase	Female
UBTD2	-1.00559	0.0112852	0.99431	Increase	Female
FBXO3	-1.07096	0.161604	0.909356	Increase	Female
POLR2H	-0.852226	-0.248633	1.10086	Increase	Female
HSPA5	-1.06929	0.157198	0.912091	Increase	Female
CDC25B	-0.973163	-0.0516707	1.02483	Increase	Female
IFRD1	-1.01006	0.0204304	0.989628	Increase	Female
TEAD4	-0.946974	-0.0987275	1.0457	Increase	Female
KCTD6	-1.05661	0.124966	0.931644	Increase	Female
CARS	-1.12427	0.334085	0.790188	Increase	Female
UBR7	-1.08845	0.210368	0.87808	Increase	Female
CX3CR1	-0.942992	-0.10563	1.04862	Increase	Female
RPS27	-0.925715	-0.134878	1.06059	Increase	Female
CTNNAL1	-0.861974	-0.234408	1.09638	Increase	Female
HVCN1	-1.01853	0.0381612	0.980373	Increase	Female
SCAMP3	-1.13512	0.38416	0.750955	Increase	Female
AMZ2P1	-0.939457	-0.111705	1.05116	Increase	Female
ADAP2	-0.890377	-0.191539	1.08192	Increase	Female
IFI16	-0.935593	-0.118291	1.05388	Increase	Female
DOCK9	-1.0299	0.0627463	0.967149	Increase	Female
EIF4A1	-1.12965	0.357665	0.771987	Increase	Female
ECI2	-1.10737	0.270331	0.837043	Increase	Female
OS9	-1.13173	0.367383	0.764345	Increase	Female
CASP1	-0.81689	-0.298321	1.11521	Increase	Female
PLSCR4	-1.063	0.140964	0.922038	Increase	Female
FGFR1OP2	-1.02622	0.0546815	0.971537	Increase	Female
UFC1	-1.12944	0.356712	0.772731	Increase	Female
MPLKIP	-1.13096	0.363742	0.767217	Increase	Female
KDM3A	-1.10646	0.267198	0.83926	Increase	Female
PHC1	-1.12752	0.348082	0.779441	Increase	Female
ACVR1B	-1.11494	0.297304	0.817633	Increase	Female
C2CD2	-1.13002	0.359341	0.770675	Increase	Female
ADNP	-1.11241	0.288031	0.824374	Increase	Female
NUP58	-1.02421	0.0503164	0.973892	Increase	Female
IQCJ.SCHIP1	-1.09612	0.23358	0.862537	Increase	Female
YTHDF1	-1.13877	0.403825	0.734941	Increase	Female
BMI1	-0.974325	-0.0495105	1.02384	Increase	Female
RNF6	-1.12316	0.329468	0.793696	Increase	Female
HDAC7	-0.870073	-0.222405	1.09248	Increase	Female
MSI2	-1.04959	0.107943	0.94165	Increase	Female
DBNDD2	-1.06141	0.136932	0.924477	Increase	Female
GNG7	-0.910475	-0.159804	1.07028	Increase	Female
ZNF638	-1.07934	0.184326	0.895013	Increase	Female
TYMP	-0.997364	-0.00525051	1.00261	Increase	Female
SACS	-1.05727	0.126605	0.930669	Increase	Female
QDPR	-0.901965	-0.173392	1.07536	Increase	Female
SGPP1	-1.09192	0.220705	0.871211	Increase	Female
RALGPS1	-1.07839	0.181682	0.896703	Increase	Female
KCTD4	-0.814853	-0.3011	1.11595	Increase	Female
GEMIN7	-1.07689	0.177565	0.899323	Increase	Female
SLC41A1	-1.07249	0.165665	0.906822	Increase	Female
TOB1	-1.03203	0.0674887	0.964546	Increase	Female
UBR5	-0.991784	-0.0162343	1.00802	Increase	Female
HSPE1	-1.03184	0.067048	0.964789	Increase	Female
EMP1	-1.09481	0.229529	0.86528	Increase	Female
GAL3ST4	-0.785519	-0.340194	1.12571	Increase	Female
SLC52A3	-0.787788	-0.33723	1.12502	Increase	Female
CHST6	-0.942982	-0.105647	1.04863	Increase	Female
BCL6B	-0.837917	-0.269097	1.10701	Increase	Female
AAAS	-0.814954	-0.300963	1.11592	Increase	Female
RBM38	-0.868371	-0.224942	1.09331	Increase	Female
RRNAD1	-0.984695	-0.029937	1.01463	Increase	Female
PLEKHO2	-1.10806	0.272698	0.835364	Increase	Female
NR2C1	-0.850236	-0.251509	1.10174	Increase	Female
NUP98	-0.989804	-0.0200887	1.00989	Increase	Female
SLC6A15	-1.13178	0.367621	0.764156	Increase	Female
HLA.DRA	-1.06056	0.134802	0.925761	Increase	Female
SRF	-1.01077	0.0218968	0.988872	Increase	Female
GSPT1	-1.1309	0.36347	0.767432	Increase	Female
MEGF9	-1.1278	0.349288	0.778508	Increase	Female
GTF2IP4	-1.10862	0.274628	0.833991	Increase	Female
RAB29	-0.925195	-0.135742	1.06094	Increase	Female
SUN2	-0.905471	-0.167822	1.07329	Increase	Female
SEC11A	-1.07604	0.175244	0.900795	Increase	Female
MFF	-1.1253	0.338429	0.786871	Increase	Female
RANGRF	-1.10363	0.257719	0.845915	Increase	Female
FYB	-1.02411	0.0500988	0.974009	Increase	Female
CTCF	-1.06959	0.157999	0.911595	Increase	Female
ADCYAP1R1	-1.10842	0.273923	0.834493	Increase	Female
SH3BGRL2	-1.11017	0.280072	0.830103	Increase	Female
GPN1	-1.13451	0.381044	0.753461	Increase	Female
FAM53B	-0.908699	-0.162659	1.07136	Increase	Female
PPP2R3C	-1.11942	0.314397	0.805021	Increase	Female
ABHD6	-1.09167	0.219969	0.871703	Increase	Female
RBM22	-1.1106	0.281559	0.829037	Increase	Female
SMIM15	-1.12488	0.336651	0.788231	Increase	Female
GRN	-0.924957	-0.136138	1.06109	Increase	Female
EBI3	-0.999213	-0.00157211	1.00079	Increase	Female
NXT1	-0.988863	-0.0219138	1.01078	Increase	Female
DTX3	-0.880761	-0.206299	1.08706	Increase	Female
C3	-0.901036	-0.174863	1.0759	Increase	Female
DEF8	-1.12046	0.318502	0.801955	Increase	Female
USP34	-1.01756	0.0361008	0.981461	Increase	Female
TAF1C	-0.966784	-0.063414	1.0302	Increase	Female
PAPD7	-1.08377	0.196813	0.886961	Increase	Female
USP21	-0.840726	-0.265118	1.10584	Increase	Female
USF1	-1.01987	0.0410066	0.978866	Increase	Female
ARRDC3	-1.00073	0.00146031	0.999269	Increase	Female
SH3TC1	-0.811866	-0.305162	1.11703	Increase	Female
CDV3	-1.08757	0.207797	0.879776	Increase	Female
CNOT6	-0.960654	-0.0745224	1.03518	Increase	Female
GGT5	-1.09391	0.226767	0.867143	Increase	Female
GNG10	-1.09865	0.241562	0.857092	Increase	Female
FAM96A	-0.923171	-0.139095	1.06227	Increase	Female
FLI1	-0.849521	-0.25254	1.10206	Increase	Female
TPM4	-1.04378	0.0942242	0.949553	Increase	Female
WDR19	-0.89849	-0.178877	1.07737	Increase	Female
STARD8	-0.783352	-0.343014	1.12637	Increase	Female
COL16A1	-0.765024	-0.366523	1.13155	Increase	Female
KIAA1109	-1.12123	0.321598	0.799634	Increase	Female
TMEM173	-0.842668	-0.262356	1.10502	Increase	Female
RPS15A	-1.07192	0.164164	0.90776	Increase	Female
IFI44	-1.11027	0.280393	0.829873	Increase	Female
HSP90B1	-1.10723	0.26983	0.837398	Increase	Female
TPP1	-1.12957	0.35729	0.77228	Increase	Female
HMGN1	-1.11676	0.304149	0.812612	Increase	Female
VASP	-0.774804	-0.354055	1.12886	Increase	Female
KCNIP2	-0.798712	-0.322824	1.12154	Increase	Female
ERVK3.1	-1.0921	0.221269	0.870834	Increase	Female
HNRNPA2B1	-1.03634	0.0771573	0.959186	Increase	Female
SEMA4B	-1.11038	0.28081	0.829574	Increase	Female
TMEM170B	-1.04795	0.104029	0.943919	Increase	Female
ELK1	-0.876067	-0.21341	1.08948	Increase	Female
KMT5A	-0.992429	-0.0149747	1.0074	Increase	Female
GABPA	-1.03182	0.0670148	0.964807	Increase	Female
NFYB	-1.03171	0.0667603	0.964947	Increase	Female
MRGPRF	-0.823832	-0.28878	1.11261	Increase	Female
RNF220	-1.12079	0.319818	0.800969	Increase	Female
XPOT	-1.1312	0.364863	0.766334	Increase	Female
GID8	-1.14038	0.413175	0.727203	Increase	Female
RPS10	-1.13544	0.385859	0.749586	Increase	Female
MCAM	-0.907379	-0.164775	1.07215	Increase	Female
TAOK3	-1.12115	0.321256	0.799891	Increase	Female
TMEM216	-0.943412	-0.104905	1.04832	Increase	Female
RNU1.28P	-0.865849	-0.228686	1.09454	Increase	Female
FUBP3	-1.13718	0.395027	0.742149	Increase	Female
PDLIM5	-1.11731	0.306258	0.811057	Increase	Female
FKBP4	-0.935009	-0.119282	1.05429	Increase	Female
FES	-0.82425	-0.288202	1.11245	Increase	Female
CDC42EP2	-0.790175	-0.334102	1.12428	Increase	Female
SNAPC5	-1.11189	0.286176	0.825714	Increase	Female
LILRB1	-0.841079	-0.264617	1.1057	Increase	Female
FGD2	-0.844442	-0.259826	1.10427	Increase	Female
CMTM7	-0.835072	-0.273109	1.10818	Increase	Female
PDLIM2	-1.06629	0.149378	0.916908	Increase	Female
PDYN	-0.83338	-0.275486	1.10887	Increase	Female
MBNL1	-1.05692	0.125728	0.931191	Increase	Female
VAT1	-0.888964	-0.193724	1.08269	Increase	Female
HIRA	-1.13055	0.361822	0.768728	Increase	Female
CGGBP1	-1.01583	0.0324441	0.983383	Increase	Female
RPS3	-0.982455	-0.0342118	1.01667	Increase	Female
TMEM44	-1.13431	0.380037	0.754269	Increase	Female
TMEM263	-1.06669	0.150431	0.916262	Increase	Female
MCF2L2	-0.998149	-0.00369241	1.00184	Increase	Female
TBC1D20	-1.05735	0.126797	0.930554	Increase	Female
DNAJB11	-1.04936	0.107381	0.941976	Increase	Female
GOLPH3	-0.962395	-0.0713853	1.03378	Increase	Female
MFSD5	-1.13679	0.392948	0.743842	Increase	Female
CARD8	-0.918704	-0.146443	1.06515	Increase	Female
CNOT11	-1.08609	0.203476	0.882614	Increase	Female
FAM122B	-1.13987	0.410166	0.729702	Increase	Female
HAMP	-1.05198	0.113666	0.93831	Increase	Female
CDK2	-0.990178	-0.0193634	1.00954	Increase	Female
CXCL2	-1.0506	0.110354	0.940246	Increase	Female
CRTC2	-0.944786	-0.102529	1.04731	Increase	Female
ZNF558	-1.03377	0.0713599	0.962409	Increase	Female
CD74	-0.962287	-0.0715802	1.03387	Increase	Female
USP12	-1.04998	0.108864	0.941114	Increase	Female
U2AF2	-1.04452	0.0959528	0.948565	Increase	Female
PEX6	-0.852441	-0.248322	1.10076	Increase	Female
AK4	-0.987024	-0.0254652	1.01249	Increase	Female
SLC15A3	-0.906351	-0.166418	1.07277	Increase	Female
RHOA	-1.11408	0.294128	0.81995	Increase	Female
PTPN2	-0.884289	-0.200914	1.0852	Increase	Female
GTF3A	-0.881924	-0.204528	1.08645	Increase	Female
POP5	-1.05148	0.112463	0.939014	Increase	Female
TMEM70	-1.13267	0.371923	0.760746	Increase	Female
ZBTB7B	-0.755903	-0.377996	1.1339	Increase	Female
BIN1	-0.856222	-0.242831	1.09905	Increase	Female
HSD11B2	-0.877023	-0.211968	1.08899	Increase	Female
ARF4	-1.13799	0.399486	0.738504	Increase	Female
SLCO2B1	-0.93521	-0.118941	1.05415	Increase	Female
HSP90AA1	-1.00754	0.0152534	0.992286	Increase	Female
PDE4B	-1.09219	0.221519	0.870666	Increase	Female
ATF3	-1.11756	0.307182	0.810374	Increase	Female
CFH	-0.955182	-0.0842988	1.03948	Increase	Female
EHD2	-1.10296	0.255505	0.847459	Increase	Female
DPM2	-1.0697	0.158274	0.911424	Increase	Female
ATG4B	-0.983097	-0.032989	1.01609	Increase	Female
FAM220A	-1.13993	0.410547	0.729386	Increase	Female
PRRX1	-1.04232	0.0908361	0.951483	Increase	Female
TMEM50B	-0.840084	-0.26603	1.10611	Increase	Female
ELOVL7	-0.791608	-0.332219	1.12383	Increase	Female
RPS27A	-0.949258	-0.0947405	1.044	Increase	Female
PARP1	-1.09323	0.224692	0.868539	Increase	Female
FCHSD2	-0.878388	-0.209901	1.08829	Increase	Female
FERMT2	-1.12213	0.32524	0.796892	Increase	Female
DLG5	-1.07804	0.180735	0.897307	Increase	Female
DIXDC1	-1.01723	0.0353949	0.981833	Increase	Female
ZNF680	-0.870599	-0.22162	1.09222	Increase	Female
EMP2	-0.937363	-0.115282	1.05264	Increase	Female
NGDN	-1.04499	0.0970597	0.947931	Increase	Female
ACD	-0.966082	-0.0646944	1.03078	Increase	Female
EEF1A1	-1.1049	0.261926	0.84297	Increase	Female
SCAMP2	-1.01045	0.021228	0.989217	Increase	Female
RERG	-1.05656	0.124844	0.931716	Increase	Female
SOWAHA	-0.75168	-0.38326	1.13494	Increase	Female
ANKIB1	-1.1182	0.30967	0.808533	Increase	Female
ICAM2	-0.994123	-0.0116522	1.00578	Increase	Female
NOP10	-0.93439	-0.120331	1.05472	Increase	Female
KCNA1	-1.07943	0.184564	0.894861	Increase	Female
ELAVL1	-1.09716	0.236828	0.860327	Increase	Female
MLEC	-0.942065	-0.107228	1.04929	Increase	Female
CHTF8	-0.901868	-0.173547	1.07541	Increase	Female
HSD17B4	-1.00627	0.0126598	0.99361	Increase	Female
RHOJ	-0.781086	-0.345954	1.12704	Increase	Female
RAB8A	-1.12866	0.353172	0.775492	Increase	Female
GLTP	-0.902381	-0.172734	1.07511	Increase	Female
GIT1	-0.916912	-0.149372	1.06628	Increase	Female
DNAJB1	-1.04484	0.0967032	0.948135	Increase	Female
CBWD1	-1.1281	0.350647	0.777454	Increase	Female
LINC00847	-0.991741	-0.016318	1.00806	Increase	Female
CNEP1R1	-1.03173	0.066816	0.964916	Increase	Female
ARHGEF10L	-0.945634	-0.101058	1.04669	Increase	Female
LAPTM4A	-1.08713	0.206509	0.880623	Increase	Female
SMG9	-1.07628	0.175896	0.900382	Increase	Female
BANF1	-0.900215	-0.17616	1.07637	Increase	Female
SNX32	-0.852329	-0.248485	1.10081	Increase	Female
ANXA5	-0.968966	-0.0594192	1.02838	Increase	Female
NPY1R	-0.822196	-0.291038	1.11323	Increase	Female
DIP2B	-1.11598	0.301202	0.814779	Increase	Female
AKT2	-0.949392	-0.0945061	1.0439	Increase	Female
STIP1	-0.887423	-0.196102	1.08352	Increase	Female
2006-09-01	-0.971304	-0.0551118	1.02642	Increase	Female
MTMR11	-0.970618	-0.0563782	1.027	Increase	Female
PNRC2	-0.995258	-0.00941824	1.00468	Increase	Female
CDK4	-1.07284	0.166614	0.906228	Increase	Female
NADSYN1	-1.00322	0.00647228	0.996748	Increase	Female
NECAP2	-0.951067	-0.091567	1.04263	Increase	Female
SEC61A1	-1.03393	0.0717289	0.962204	Increase	Female
SERTAD1	-0.827232	-0.28407	1.1113	Increase	Female
TIMM9	-1.11699	0.305006	0.81198	Increase	Female
CCT5	-1.0805	0.187568	0.892935	Increase	Female
PRKCD	-1.13756	0.397118	0.740442	Increase	Female
VEGFA	-1.11735	0.306404	0.810949	Increase	Female
PRRG1	-0.988628	-0.0223678	1.011	Increase	Female
DOCK1	-0.970264	-0.0570307	1.02729	Increase	Female
TMEM155	-1.11651	0.303193	0.813316	Increase	Female
FAM65C	-0.840902	-0.264868	1.10577	Increase	Female
ACTL6A	-0.970916	-0.0558286	1.02674	Increase	Female
HLA.B	-1.0055	0.0110871	0.99441	Increase	Female
HPS4	-1.04483	0.0966918	0.948142	Increase	Female
CAPN2	-0.835226	-0.272892	1.10812	Increase	Female
KRCC1	-1.07507	0.172607	0.902461	Increase	Female
BTBD6	-1.07975	0.185471	0.89428	Increase	Female
EIF2S1	-1.11958	0.315045	0.804538	Increase	Female
GATM	-1.11212	0.286996	0.825122	Increase	Female
HIPK1	-1.02792	0.0584059	0.969517	Increase	Female
SHC4	-0.922018	-0.140997	1.06302	Increase	Female
EIF4EBP1	-0.851418	-0.249802	1.10122	Increase	Female
TCF12	-0.96171	-0.0726202	1.03433	Increase	Female
FOXN3	-0.874497	-0.215777	1.09027	Increase	Female
TBC1D23	-1.11519	0.298235	0.816953	Increase	Female
LAYN	-0.870292	-0.222078	1.09237	Increase	Female
LPIN1	-0.923267	-0.138937	1.0622	Increase	Female
FGF1	-0.997057	-0.00586103	1.00292	Increase	Female
DNAJB6	-1.07562	0.174109	0.901512	Increase	Female
ANXA3	-0.930244	-0.127318	1.05756	Increase	Female
ARHGEF25	-1.04502	0.0971341	0.947889	Increase	Female
SEPW1	-0.99328	-0.0133074	1.00659	Increase	Female
SLC22A23	-1.04438	0.0956216	0.948754	Increase	Female
PICALM	-1.06136	0.136807	0.924553	Increase	Female
FAM91A1	-1.08647	0.204583	0.881888	Increase	Female
CGRRF1	-0.974693	-0.0488257	1.02352	Increase	Female
PITPNM2	-0.985733	-0.0279485	1.01368	Increase	Female
RAPGEF4	-1.06032	0.134203	0.926122	Increase	Female
ILK	-1.10615	0.266157	0.839994	Increase	Female
TIA1	-1.04186	0.0897672	0.95209	Increase	Female
PHF19	-0.998177	-0.00363654	1.00181	Increase	Female
ADA	-0.953996	-0.0864005	1.0404	Increase	Female
NACA	-1.09389	0.226716	0.867178	Increase	Female
NFKB1	-0.993456	-0.0129611	1.00642	Increase	Female
LAMA4	-0.860979	-0.235871	1.09685	Increase	Female
SNAPIN	-1.13437	0.380343	0.754024	Increase	Female
MAP3K8	-0.837231	-0.270067	1.1073	Increase	Female
RAB12	-1.11186	0.286055	0.825801	Increase	Female
CDH5	-1.04527	0.0977221	0.947551	Increase	Female
KLHL2	-1.00408	0.00820297	0.995873	Increase	Female
CIDECP	-1.08587	0.202851	0.883023	Increase	Female
WBP1L	-0.983801	-0.0316462	1.01545	Increase	Female
YRDC	-1.00019	0.000388241	0.999806	Increase	Female
TXNDC5	-1.07448	0.171007	0.903469	Increase	Female
FCGR3A	-0.913435	-0.155024	1.06846	Increase	Female
KDM2A	-1.01468	0.0300338	0.984645	Increase	Female
RPS21	-1.11745	0.306785	0.810668	Increase	Female
RBM14.RBM4	-0.832395	-0.276867	1.10926	Increase	Female
ADGRL4	-0.92129	-0.142197	1.06349	Increase	Female
PRPF38A	-1.12887	0.354085	0.774781	Increase	Female
SPI1	-0.935133	-0.119072	1.05421	Increase	Female
SH3BP5	-1.01964	0.0405166	0.979126	Increase	Female
PSD2	-1.03291	0.0694397	0.96347	Increase	Female
SIPA1	-0.876967	-0.212052	1.08902	Increase	Female
PPP6R3	-1.09858	0.241315	0.857261	Increase	Female
HSPA8	-1.1404	0.413333	0.727071	Increase	Female
CTB.78F1.1	-1.027	0.0563876	0.970613	Increase	Female
BTN3A2	-1.08374	0.196715	0.887025	Increase	Female
RAP1B	-1.04659	0.100827	0.945767	Increase	Female
RPL21P75	-0.921062	-0.142573	1.06363	Increase	Female
CNDP1	-1.07786	0.180243	0.89762	Increase	Female
RPL37A	-1.09732	0.237358	0.859966	Increase	Female
POLE	-0.811879	-0.305144	1.11702	Increase	Female
PELI1	-0.904647	-0.169135	1.07378	Increase	Female
CYTL1	-0.813573	-0.302844	1.11642	Increase	Female
POLDIP3	-0.988857	-0.0219249	1.01078	Increase	Female
LAMA5	-0.779948	-0.347428	1.12738	Increase	Female
HCST	-0.92874	-0.129837	1.05858	Increase	Female
TIMM21	-1.03536	0.0749279	0.960428	Increase	Female
CBFB	-1.08702	0.206191	0.880832	Increase	Female
HDAC4	-1.02502	0.0520761	0.972944	Increase	Female
SNX11	-0.945378	-0.101502	1.04688	Increase	Female
FBXL3	-1.04952	0.107763	0.941754	Increase	Female
2008-03-01	-0.909036	-0.162118	1.07115	Increase	Female
SNN	-1.08943	0.213277	0.876156	Increase	Female
ARPC5	-1.05183	0.113303	0.938523	Increase	Female
FAM84B	-0.947197	-0.0983399	1.04554	Increase	Female
NOTCH4	-1.05135	0.11216	0.939191	Increase	Female
APOC1	-1.02454	0.0510244	0.973511	Increase	Female
FAN1	-1.07577	0.17451	0.901259	Increase	Female
SP1	-0.907286	-0.164923	1.07221	Increase	Female
PCNP	-1.13165	0.36699	0.764655	Increase	Female
SRSF1	-1.0729	0.166758	0.906138	Increase	Female
CYBA	-0.933924	-0.121118	1.05504	Increase	Female
EDIL3	-1.00975	0.0197934	0.989956	Increase	Female
STAG2	-1.04619	0.0998688	0.946318	Increase	Female
SH3BP2	-0.987353	-0.0248321	1.01218	Increase	Female
HERPUD1	-1.08235	0.192756	0.889591	Increase	Female
GPAT4	-1.12616	0.342119	0.78404	Increase	Female
CENPT	-1.08328	0.195419	0.887866	Increase	Female
CASP7	-0.795509	-0.327073	1.12258	Increase	Female
SNX2	-1.10688	0.268631	0.838247	Increase	Female
PGS1	-1.03167	0.0666733	0.964995	Increase	Female
LHX2	-1.00617	0.0124657	0.993709	Increase	Female
KCNK9	-0.895937	-0.182882	1.07882	Increase	Female
HDDC2	-1.04292	0.0922317	0.950689	Increase	Female
GPR108	-0.819291	-0.295033	1.11432	Increase	Female
FYTTD1	-1.1226	0.327156	0.795446	Increase	Female
ALDH9A1	-1.12711	0.346279	0.780835	Increase	Female
NUS1	-1.13162	0.366859	0.764759	Increase	Female
MTA2	-0.916565	-0.149937	1.0665	Increase	Female
SLC2A3	-0.91573	-0.151298	1.06703	Increase	Female
PPP4R3A	-1.02495	0.0519177	0.97303	Increase	Female
GLUL	-1.1222	0.325521	0.796681	Increase	Female
PSMD11	-1.08467	0.19937	0.885297	Increase	Female
RNF144A	-0.889274	-0.193245	1.08252	Increase	Female
ATF2	-1.10161	0.251072	0.850539	Increase	Female
CAMSAP2	-1.13316	0.374306	0.75885	Increase	Female
TDRP	-1.01019	0.0206983	0.98949	Increase	Female
PLAT	-1.08917	0.212499	0.876672	Increase	Female
TLE3	-1.10206	0.252544	0.849518	Increase	Female
TBC1D2B	-0.891515	-0.189775	1.08129	Increase	Female
HPS3	-1.09813	0.239893	0.858234	Increase	Female
GTF2B	-1.11574	0.300283	0.815453	Increase	Female
ZNF532	-1.04574	0.0988082	0.946928	Increase	Female
UBE2F	-1.10623	0.266416	0.839811	Increase	Female
B4GALT5	-1.12848	0.352347	0.776133	Increase	Female
NPR2	-0.938251	-0.113767	1.05202	Increase	Female
S1PR1	-1.05213	0.114042	0.93809	Increase	Female
PAPD4	-1.0865	0.204666	0.881834	Increase	Female
TMEM123	-1.03387	0.0715849	0.962284	Increase	Female
NASP	-1.02774	0.0580157	0.969729	Increase	Female
TMEM69	-1.11565	0.299946	0.8157	Increase	Female
MGAT5	-1.11828	0.309982	0.808302	Increase	Female
HSPB8	-1.11267	0.288984	0.823685	Increase	Female
RAB20	-0.950074	-0.0933104	1.04338	Increase	Female
RP11.465B22.3	-0.915684	-0.151372	1.06706	Increase	Female
PDGFA	-1.08207	0.191988	0.890087	Increase	Female
CKLF	-0.93284	-0.122951	1.05579	Increase	Female
PCED1B.AS1	-0.882342	-0.203891	1.08623	Increase	Female
RPS12	-1.07349	0.168343	0.905144	Increase	Female
RAB32	-0.974322	-0.0495167	1.02384	Increase	Female
RNF141	-1.06336	0.141869	0.92149	Increase	Female
BAX	-0.917897	-0.147763	1.06566	Increase	Female
YTHDF3	-1.11491	0.297196	0.817712	Increase	Female
RPL31	-0.784793	-0.341139	1.12593	Increase	Female
KCNJ8	-1.02724	0.0569151	0.970327	Increase	Female
ZMYND8	-0.973466	-0.0511082	1.02457	Increase	Female
SRSF10	-1.0245	0.0509405	0.973556	Increase	Female
WDFY1	-1.13157	0.366612	0.764954	Increase	Female
PLAUR	-0.948358	-0.0963153	1.04467	Increase	Female
FAM171A1	-1.13066	0.36235	0.768313	Increase	Female
CSRP1	-0.849	-0.25329	1.10229	Increase	Female
CD22	-0.966969	-0.0630757	1.03004	Increase	Female
TXLNA	-0.909261	-0.161756	1.07102	Increase	Female
H2AFZ	-1.03009	0.0631793	0.966912	Increase	Female
RNF38	-1.11495	0.297343	0.817605	Increase	Female
CTB.89H12.4	-1.02666	0.0556533	0.971011	Increase	Female
DOK3	-0.86288	-0.233074	1.09595	Increase	Female
SESN2	-1.02562	0.0533718	0.972245	Increase	Female
ASXL1	-1.08396	0.197339	0.886619	Increase	Female
RBPMS	-1.06291	0.140739	0.922175	Increase	Female
PPIL1	-1.09452	0.228642	0.865879	Increase	Female
UBA7	-0.845611	-0.258155	1.10377	Increase	Female
LPL	-1.06129	0.136626	0.924662	Increase	Female
FAM221A	-1.13493	0.383184	0.751741	Increase	Female
HDAC3	-1.06931	0.157241	0.912064	Increase	Female
RNF213	-0.974388	-0.0493933	1.02378	Increase	Female
COPB2	-1.13238	0.370535	0.761848	Increase	Female
LEMD3	-1.12118	0.321391	0.799789	Increase	Female
TJP1	-1.10966	0.27827	0.831393	Increase	Female
TNFRSF1B	-0.942776	-0.106003	1.04878	Increase	Female
SLC2A13	-1.10385	0.258424	0.845423	Increase	Female
PMF1.BGLAP	-1.00745	0.0150751	0.992377	Increase	Female
ACSL5	-0.958239	-0.0788535	1.03709	Increase	Female
MLLT3	-1.0655	0.147361	0.918143	Increase	Female
PRKAR2B	-1.126	0.341418	0.784579	Increase	Female
TCF3	-0.906587	-0.166041	1.07263	Increase	Female
EVA1B	-0.929456	-0.128639	1.05809	Increase	Female
MACF1	-1.02187	0.0452828	0.976589	Increase	Female
CIPC	-0.928284	-0.130599	1.05888	Increase	Female
RAD21	-1.12833	0.351691	0.776643	Increase	Female
PSRC1	-0.956864	-0.0813081	1.03817	Increase	Female
P4HA2	-0.870166	-0.222267	1.09243	Increase	Female
ANKRD37	-1.08076	0.188288	0.892472	Increase	Female
ATG101	-1.11623	0.302122	0.814103	Increase	Female
LYRM5	-1.09273	0.223161	0.869566	Increase	Female
MIDN	-1.10146	0.250592	0.850871	Increase	Female
IQGAP1	-0.92679	-0.133091	1.05988	Increase	Female
TRMT61B	-0.960689	-0.0744601	1.03515	Increase	Female
CLIC4	-1.12307	0.329084	0.793987	Increase	Female
WBP5	-0.981935	-0.0352009	1.01714	Increase	Female
RFNG	-0.897859	-0.179868	1.07773	Increase	Female
RP11.64B16.2	-0.943773	-0.104281	1.04805	Increase	Female
MMRN2	-0.850188	-0.251579	1.10177	Increase	Female
RP11.553L6.5	-0.910379	-0.159959	1.07034	Increase	Female
MED21	-1.04524	0.0976493	0.947593	Increase	Female
CGNL1	-1.05839	0.129379	0.929013	Increase	Female
CCDC50	-0.931852	-0.124616	1.05647	Increase	Female
TNFRSF10B	-0.934937	-0.119404	1.05434	Increase	Female
GIMAP5	-0.862575	-0.233523	1.0961	Increase	Female
MSX1	-0.764953	-0.366613	1.13157	Increase	Female
CAB39L	-1.00573	0.0115703	0.994165	Increase	Female
STC1	-0.930896	-0.126224	1.05712	Increase	Female
RIMS4	-1.01865	0.0384048	0.980244	Increase	Female
STX6	-1.07906	0.183539	0.895517	Increase	Female
AAR2	-1.02316	0.04806	0.975103	Increase	Female
FOLR2	-0.82463	-0.287676	1.11231	Increase	Female
RB1	-1.01775	0.0365096	0.981245	Increase	Female
DHX9	-1.10685	0.268546	0.838307	Increase	Female
SMARCA1	-1.11078	0.282229	0.828555	Increase	Female
LSM10	-1.00988	0.0200618	0.989818	Increase	Female
GPR34	-0.891525	-0.189759	1.08128	Increase	Female
SAMHD1	-0.894151	-0.185672	1.07982	Increase	Female
USP30	-1.08997	0.21488	0.875092	Increase	Female
BOD1	-1.08647	0.204584	0.881888	Increase	Female
GGA3	-1.13164	0.366982	0.764662	Increase	Female
SPR	-0.915923	-0.150983	1.06691	Increase	Female
IKZF5	-0.994452	-0.0110054	1.00546	Increase	Female
USP54	-0.755499	-0.378501	1.134	Increase	Female
OTUD4	-1.00269	0.00540143	0.997288	Increase	Female
KHSRP	-1.1266	0.344047	0.782557	Increase	Female
ARID5A	-0.948486	-0.0960912	1.04458	Increase	Female
RPL11	-1.13279	0.372494	0.760292	Increase	Female
NFKB2	-1.03734	0.0794078	0.957929	Increase	Female
SLC18B1	-0.998736	-0.00252325	1.00126	Increase	Female
POLR2J	-1.11321	0.290967	0.822248	Increase	Female
HSPH1	-0.989702	-0.0202882	1.00999	Increase	Female
FTSJ1	-1.08639	0.20436	0.882034	Increase	Female
PALD1	-0.836531	-0.271054	1.10759	Increase	Female
IFT80	-1.1397	0.409168	0.730529	Increase	Female
CCDC85C	-0.82996	-0.280272	1.11023	Increase	Female
LPAR2	-0.926136	-0.134179	1.06032	Increase	Female
CECR5	-1.11999	0.316642	0.803346	Increase	Female
TRHDE.AS1	-1.00944	0.0191485	0.990288	Increase	Female
ARHGEF7	-1.12579	0.340506	0.785279	Increase	Female
RGS19	-0.906447	-0.166265	1.07271	Increase	Female
RBM23	-0.813955	-0.302323	1.11628	Increase	Female
TFEB	-0.751319	-0.383709	1.13503	Increase	Female
PARVB	-1.00125	0.00250891	0.998743	Increase	Female
IFRD2	-0.906856	-0.165611	1.07247	Increase	Female
MED13L	-0.972595	-0.052724	1.02532	Increase	Female
FGR	-0.875451	-0.21434	1.08979	Increase	Female
ZNF410	-0.906655	-0.165932	1.07259	Increase	Female
EIF2B4	-0.991832	-0.0161404	1.00797	Increase	Female
PRKAB2	-1.08568	0.202289	0.88339	Increase	Female
SHMT2	-1.0499	0.108678	0.941222	Increase	Female
OSTC	-1.10483	0.261707	0.843124	Increase	Female
SP100	-1.02208	0.0457227	0.976354	Increase	Female
ZFR	-1.04724	0.102362	0.944882	Increase	Female
VGLL4	-0.971418	-0.0549017	1.02632	Increase	Female
AFF4	-1.08937	0.213085	0.876283	Increase	Female
CDK11A	-0.805486	-0.313772	1.11926	Increase	Female
DERL2	-0.899579	-0.177162	1.07674	Increase	Female
RASIP1	-0.935772	-0.117989	1.05376	Increase	Female
MBIP	-1.05585	0.123093	0.932756	Increase	Female
TBRG4	-1.03454	0.0730959	0.961446	Increase	Female
BCL2L1	-0.947462	-0.0978787	1.04534	Increase	Female
CNIH1	-1.06229	0.139151	0.923137	Increase	Female
SLC35E2B	-1.06302	0.140996	0.922019	Increase	Female
HNRNPK	-1.13052	0.361703	0.768821	Increase	Female
MUS81	-1.05889	0.130614	0.928275	Increase	Female
IFNGR2	-0.980006	-0.0388553	1.01886	Increase	Female
PDZD2	-0.903125	-0.171554	1.07468	Increase	Female
RASSF3	-0.961824	-0.0724151	1.03424	Increase	Female
PDE4DIP	-1.05518	0.121443	0.933733	Increase	Female
SLC26A6	-0.897571	-0.180321	1.07789	Increase	Female
THOC1	-1.06634	0.149508	0.916829	Increase	Female
SERPINH1	-0.964483	-0.0676032	1.03209	Increase	Female
MCMBP	-1.09534	0.23118	0.864163	Increase	Female
AHSA1	-0.956479	-0.081993	1.03847	Increase	Female
HNRNPU.AS1	-0.842167	-0.26307	1.10524	Increase	Female
DEDD	-1.03137	0.0660075	0.965361	Increase	Female
SEMA4D	-0.765131	-0.366387	1.13152	Increase	Female
PATL1	-0.986192	-0.0270665	1.01326	Increase	Female
FBXO42	-0.934793	-0.119648	1.05444	Increase	Female
HSPA2	-0.877431	-0.211351	1.08878	Increase	Female
ADCY3	-1.01215	0.0247595	0.98739	Increase	Female
AMPD2	-0.848325	-0.254261	1.10259	Increase	Female
ST13	-1.11021	0.280196	0.830014	Increase	Female
RASGEF1A	-1.13925	0.406578	0.732671	Increase	Female
TRIAP1	-1.14041	0.413349	0.727059	Increase	Female
SLC46A3	-0.964795	-0.0670376	1.03183	Increase	Female
ATHL1	-0.781895	-0.344905	1.1268	Increase	Female
FAM50A	-1.04442	0.0957206	0.948698	Increase	Female
ERBB2IP	-0.943506	-0.104743	1.04825	Increase	Female
TIAL1	-1.00342	0.00687836	0.996543	Increase	Female
BROX	-1.13446	0.380825	0.753637	Increase	Female
P2RX7	-0.806145	-0.312887	1.11903	Increase	Female
EFCAB7	-1.09764	0.23835	0.859289	Increase	Female
STRAP	-1.13532	0.385198	0.750119	Increase	Female
MINPP1	-0.991028	-0.0177088	1.00874	Increase	Female
CREBZF	-1.06262	0.139981	0.922635	Increase	Female
GGA2	-1.09889	0.242315	0.856576	Increase	Female
ADCY6	-1.13949	0.407989	0.731504	Increase	Female
HAVCR2	-0.83283	-0.276258	1.10909	Increase	Female
CCDC47	-1.1402	0.412092	0.728103	Increase	Female
SERPINB6	-0.980054	-0.0387649	1.01882	Increase	Female
DPF2	-0.822809	-0.290193	1.113	Increase	Female
IDH1	-0.942189	-0.107014	1.0492	Increase	Female
TEAD2	-0.830703	-0.279234	1.10994	Increase	Female
SUCLG2	-1.08974	0.214195	0.875547	Increase	Female
EDNRB	-1.11098	0.282906	0.828069	Increase	Female
SYF2	-1.10114	0.249533	0.851604	Increase	Female
SAR1B	-1.11693	0.304782	0.812146	Increase	Female
ADAMTS9	-1.01322	0.0269798	0.986237	Increase	Female
ARL5A	-0.870575	-0.221656	1.09223	Increase	Female
LHFP	-1.07494	0.172254	0.902684	Increase	Female
RYBP	-1.00915	0.0185529	0.990594	Increase	Female
S100A9	-1.13934	0.407096	0.732243	Increase	Female
TIPARP	-1.0392	0.0836468	0.955549	Increase	Female
UBE2L6	-1.10629	0.266641	0.839652	Increase	Female
PARP9	-0.977553	-0.0434762	1.02103	Increase	Female
HSPA13	-1.1301	0.359753	0.770351	Increase	Female
MXI1	-0.939227	-0.112098	1.05133	Increase	Female
PNRC1	-1.01726	0.0354715	0.981792	Increase	Female
AFAP1L2	-1.00789	0.0159683	0.99192	Increase	Female
MRAS	-0.822693	-0.290353	1.11305	Increase	Female
CDK19	-0.820311	-0.293632	1.11394	Increase	Female
RAD52	-1.11956	0.314964	0.804598	Increase	Female
MAX	-0.954167	-0.0860983	1.04027	Increase	Female
SNX9	-0.988903	-0.0218357	1.01074	Increase	Female
KAT2A	-0.952359	-0.0892939	1.04165	Increase	Female
AK2	-1.04671	0.101108	0.945605	Increase	Female
MTUS1	-1.00218	0.00437243	0.997807	Increase	Female
TMEM255B	-0.777901	-0.350071	1.12797	Increase	Female
SLC12A7	-0.923656	-0.138293	1.06195	Increase	Female
FGD5.AS1	-1.03488	0.0738616	0.961021	Increase	Female
AUP1	-0.850005	-0.251842	1.10185	Increase	Female
YIPF1	-1.13782	0.398568	0.739256	Increase	Female
MBNL2	-1.11082	0.282349	0.828469	Increase	Female
HLA.A	-0.983225	-0.0327462	1.01597	Increase	Female
BTN3A3	-1.01652	0.0339093	0.982614	Increase	Female
CALCOCO2	-1.11042	0.280946	0.829476	Increase	Female
SLC9A3R1	-1.12666	0.344308	0.782356	Increase	Female
HNRNPUL1	-1.13566	0.386975	0.748685	Increase	Female
CAPZA2	-1.13198	0.368588	0.763391	Increase	Female
TUBB6	-0.869678	-0.222994	1.09267	Increase	Female
TOR1AIP1	-1.12752	0.348087	0.779438	Increase	Female
CEPT1	-1.05041	0.1099	0.940511	Increase	Female
LRRC16A	-0.882941	-0.202976	1.08592	Increase	Female
DDX23	-0.914981	-0.152515	1.0675	Increase	Female
FCGRT	-0.991326	-0.0171281	1.00845	Increase	Female
EIF1	-1.07347	0.168303	0.905169	Increase	Female
HSPA1A	-0.919943	-0.144412	1.06435	Increase	Female
SELENBP1	-1.11277	0.289365	0.823409	Increase	Female
SPOCK3	-1.09973	0.245009	0.854725	Increase	Female
RANBP9	-1.10745	0.2706	0.836853	Increase	Female
TGM2	-0.838601	-0.26813	1.10673	Increase	Female
RAB31	-0.867091	-0.226845	1.09394	Increase	Female
EHD1	-1.11515	0.298111	0.817044	Increase	Female
RAPGEF5	-1.09254	0.22258	0.869956	Increase	Female
KCNT1	-1.05291	0.115913	0.936992	Increase	Female
FNDC3A	-1.11326	0.291121	0.822136	Increase	Female
SLC44A1	-0.961485	-0.0730262	1.03451	Increase	Female
MOV10	-0.824113	-0.288392	1.11251	Increase	Female
GPR37	-1.04838	0.105047	0.94333	Increase	Female
SYPL1	-1.05524	0.121605	0.933637	Increase	Female
IER2	-1.06148	0.137108	0.924371	Increase	Female
SRSF7	-1.00337	0.00677852	0.996594	Increase	Female
NCOA6	-1.08978	0.214294	0.875481	Increase	Female
RP1.111D6.3	-1.1099	0.279088	0.830808	Increase	Female
SEMA4C	-0.984163	-0.0309555	1.01512	Increase	Female
CMTM6	-0.924077	-0.137596	1.06167	Increase	Female
OAF	-1.07469	0.171578	0.90311	Increase	Female
SLC30A1	-1.02343	0.0486339	0.974796	Increase	Female
PBXIP1	-1.05244	0.11478	0.937657	Increase	Female
PIP4K2A	-0.837972	-0.269019	1.10699	Increase	Female
SNX19	-1.10033	0.24691	0.853416	Increase	Female
STK40	-1.02616	0.0545542	0.971606	Increase	Female
SURF1	-1.04541	0.0980464	0.947365	Increase	Female
APPBP2	-1.13217	0.369524	0.76265	Increase	Female
STRA13	-0.898822	-0.178354	1.07718	Increase	Female
TTC7A	-0.984585	-0.0301487	1.01473	Increase	Female
MUL1	-1.07709	0.178126	0.898967	Increase	Female
MAGI2.AS3	-0.930323	-0.127185	1.05751	Increase	Female
ARHGAP27	-0.923396	-0.138723	1.06212	Increase	Female
RAB8B	-1.1019	0.252024	0.849879	Increase	Female
BRI3	-1.11058	0.281515	0.829068	Increase	Female
NCK2	-1.10624	0.266446	0.83979	Increase	Female
AMY2B	-1.11062	0.281643	0.828976	Increase	Female
SWAP70	-0.996255	-0.00744879	1.0037	Increase	Female
TFDP1	-1.11426	0.294808	0.819455	Increase	Female
FN1	-1.06691	0.150994	0.915916	Increase	Female
MSL3	-0.999143	-0.00171138	1.00085	Increase	Female
GBP3	-1.05717	0.12634	0.930826	Increase	Female
CNTN2	-1.13814	0.400336	0.737807	Increase	Female
SMCO4	-0.930685	-0.126578	1.05726	Increase	Female
TIE1	-0.838861	-0.267762	1.10662	Increase	Female
CHMP4A	-1.06388	0.143205	0.920677	Increase	Female
HSD17B7	-0.941431	-0.108319	1.04975	Increase	Female
TMX1	-0.978382	-0.0419176	1.0203	Increase	Female
AXIN1	-0.867215	-0.22666	1.09388	Increase	Female
HMHA1	-0.97045	-0.0566886	1.02714	Increase	Female
LPIN2	-1.14011	0.411588	0.728522	Increase	Female
CSTF3	-1.0346	0.0732285	0.961373	Increase	Female
STXBP2	-0.853316	-0.247054	1.10037	Increase	Female
MAGED4B	-0.928701	-0.129902	1.0586	Increase	Female
MRPL10	-1.05696	0.125819	0.931137	Increase	Female
FZD8	-0.814297	-0.301858	1.11615	Increase	Female
PXN	-0.88035	-0.206924	1.08727	Increase	Female
CDK10	-0.933486	-0.12186	1.05535	Increase	Female
CFDP1	-1.12054	0.318818	0.801719	Increase	Female
SNHG21	-1.01215	0.0247572	0.987392	Increase	Female
PARP10	-0.955091	-0.0844603	1.03955	Increase	Female
TRIM27	-0.984756	-0.0298205	1.01458	Increase	Female
SNX14	-1.11965	0.315299	0.804348	Increase	Female
GRAMD3	-1.09837	0.240674	0.8577	Increase	Female
ARPC1B	-0.907566	-0.164475	1.07204	Increase	Female
DUSP5	-1.10401	0.258961	0.845047	Increase	Female
PPP1R16B	-0.970397	-0.0567857	1.02718	Increase	Female
RAP1A	-0.950552	-0.0924722	1.04302	Increase	Female
GNA12	-1.12076	0.319705	0.801054	Increase	Female
RANBP3L	-0.956734	-0.0815393	1.03827	Increase	Female
ZNF639	-1.11029	0.280491	0.829803	Increase	Female
BCAM	-1.0693	0.157235	0.912068	Increase	Female
ZFAND6	-1.10618	0.266243	0.839934	Increase	Female
PRDM4	-1.03746	0.0796814	0.957776	Increase	Female
GNB2L1	-1.06814	0.154184	0.913953	Increase	Female
NUDT5	-1.10518	0.262878	0.842302	Increase	Female
SAT1	-1.01779	0.0365916	0.981202	Increase	Female
LPAR5	-0.828244	-0.282663	1.11091	Increase	Female
HNRNPH1	-1.00278	0.00557964	0.997199	Increase	Female
SLC1A5	-0.958094	-0.0791119	1.03721	Increase	Female
CHAC1	-1.05473	0.120365	0.93437	Increase	Female
HS6ST1	-1.09818	0.240071	0.858113	Increase	Female
PDRG1	-1.13179	0.367695	0.764098	Increase	Female
ETS1	-0.861676	-0.234847	1.09652	Increase	Female
RP11.423H2.1	-1.06838	0.154806	0.91357	Increase	Female
FAM208A	-0.971277	-0.0551618	1.02644	Increase	Female
RHOQ	-0.92222	-0.140664	1.06288	Increase	Female
CPVL	-0.964087	-0.0683214	1.03241	Increase	Female
WNK1	-0.909129	-0.16197	1.0711	Increase	Female
TNRC6C.AS1	-0.756947	-0.376691	1.13364	Increase	Female
COMMD3	-1.04423	0.0952778	0.948951	Increase	Female
HLA.DPA1	-1.04415	0.0950912	0.949058	Increase	Female
STX3	-0.952566	-0.0889282	1.04149	Increase	Female
COBL	-0.984396	-0.0305101	1.01491	Increase	Female
GOLM1	-1.09078	0.217277	0.873498	Increase	Female
SF3A3	-1.12248	0.326677	0.795808	Increase	Female
GPBP1L1	-1.03864	0.0823861	0.956258	Increase	Female
TNFRSF12A	-0.96164	-0.072747	1.03439	Increase	Female
SLC39A12	-1.13111	0.364467	0.766646	Increase	Female
IER5L	-0.943944	-0.103986	1.04793	Increase	Female
TEX261	-1.11783	0.308248	0.809586	Increase	Female
SH3BGRL3	-1.10261	0.254353	0.848261	Increase	Female
RP11.111K18.1	-1.12416	0.33359	0.790565	Increase	Female
CDKN1B	-1.05132	0.112095	0.939229	Increase	Female
HTATIP2	-1.13589	0.388194	0.747699	Increase	Female
ZP3	-0.802958	-0.317162	1.12012	Increase	Female
FCGR2A	-0.94785	-0.0972018	1.04505	Increase	Female
TOP3B	-1.00139	0.00278319	0.998605	Increase	Female
POGK	-0.880272	-0.207044	1.08732	Increase	Female
HNRNPF	-0.945022	-0.10212	1.04714	Increase	Female
CCDC6	-1.13958	0.408474	0.731104	Increase	Female
REPIN1	-0.986056	-0.027327	1.01338	Increase	Female
DONSON	-0.911932	-0.157454	1.06939	Increase	Female
MANF	-0.957525	-0.0801293	1.03765	Increase	Female
HNRNPH3	-0.889847	-0.192359	1.08221	Increase	Female
UGT8	-1.0868	0.20554	0.88126	Increase	Female
PROSER1	-1.05481	0.120542	0.934265	Increase	Female
CHSY1	-0.838306	-0.268547	1.10685	Increase	Female
SMIM19	-0.863324	-0.232419	1.09574	Increase	Female
MKRN2	-1.0919	0.220651	0.871247	Increase	Female
SDF2	-1.11968	0.31543	0.804251	Increase	Female
PGF	-0.934038	-0.120926	1.05496	Increase	Female
DST	-1.05238	0.11464	0.937739	Increase	Female
NAPSB	-0.87339	-0.21744	1.09083	Increase	Female
EED	-1.04483	0.0966802	0.948149	Increase	Female
HIST1H2AC	-1.07316	0.167462	0.905697	Increase	Female
CDC26	-1.09608	0.233468	0.862612	Increase	Female
BTN2A1	-1.12257	0.327035	0.795537	Increase	Female
TCEB3	-1.03189	0.067174	0.964719	Increase	Female
DNAJB2	-0.769987	-0.360218	1.1302	Increase	Female
PHB	-1.12659	0.343988	0.782603	Increase	Female
TSPAN14	-0.99264	-0.0145612	1.0072	Increase	Female
ARMT1	-1.12996	0.359105	0.770859	Increase	Female
HNRNPC	-1.07622	0.175726	0.900489	Increase	Female
CAV1	-1.06143	0.136977	0.92445	Increase	Female
SLAIN1	-0.924446	-0.136984	1.06143	Increase	Female
LRP10	-1.00812	0.0164467	0.991675	Increase	Female
HS1BP3	-1.10374	0.258059	0.845678	Increase	Female
ZNF22	-0.888718	-0.194104	1.08282	Increase	Female
CD37	-0.92819	-0.130756	1.05895	Increase	Female
EZR	-0.88212	-0.204229	1.08635	Increase	Female
RP11.14N7.2	-0.891147	-0.190345	1.08149	Increase	Female
FTSJ3	-0.945416	-0.101437	1.04685	Increase	Female
EDC3	-0.885151	-0.199593	1.08474	Increase	Female
ZSWIM8	-0.757096	-0.376505	1.1336	Increase	Female
RIOK3	-1.1106	0.28156	0.829036	Increase	Female
PERP	-1.01589	0.0325681	0.983318	Increase	Female
AC096772.6	-0.997095	-0.00578393	1.00288	Increase	Female
TWF1	-1.04358	0.0937687	0.949813	Increase	Female
LIMS1	-1.00869	0.0176099	0.991079	Increase	Female
RPL12	-1.11173	0.285606	0.826126	Increase	Female
CRYAB	-0.971536	-0.0546842	1.02622	Increase	Female
MS4A4A	-0.922062	-0.140926	1.06299	Increase	Female
DHX15	-1.11789	0.308468	0.809423	Increase	Female
RCHY1	-1.11581	0.300564	0.815247	Increase	Female
RPL23	-1.13807	0.399923	0.738146	Increase	Female
SRA1	-1.01928	0.039751	0.979532	Increase	Female
BTG1	-1.00749	0.0151599	0.992334	Increase	Female
TMBIM6	-1.12854	0.352607	0.775931	Increase	Female
AKT1	-0.898983	-0.1781	1.07708	Increase	Female
EMP3	-0.966009	-0.0648283	1.03084	Increase	Female
STAT6	-0.905028	-0.168527	1.07356	Increase	Female
CERS6	-1.14086	0.416072	0.724789	Increase	Female
NOS3	-0.875181	-0.214747	1.08993	Increase	Female
CASC3	-0.796083	-0.326313	1.1224	Increase	Female
FHL2	-1.13814	0.400336	0.737808	Increase	Female
MITD1	-0.898484	-0.178886	1.07737	Increase	Female
CKS2	-0.926272	-0.133953	1.06022	Increase	Female
ABHD4	-0.925856	-0.134645	1.0605	Increase	Female
UBP1	-1.09034	0.215977	0.874363	Increase	Female
MTRF1L	-0.957544	-0.0800956	1.03764	Increase	Female
MFSD1	-1.13885	0.404298	0.734551	Increase	Female
DPH3	-1.07614	0.175526	0.900616	Increase	Female
MAGOH	-1.0018	0.00360603	0.998192	Increase	Female
BCOR	-0.96199	-0.0721151	1.03411	Increase	Female
LGALS9	-0.888913	-0.193804	1.08272	Increase	Female
LRRFIP1	-1.08509	0.200592	0.884499	Increase	Female
DRAM2	-0.978482	-0.0417286	1.02021	Increase	Female
ARHGAP5	-1.0268	0.0559444	0.970853	Increase	Female
FCGR1A	-0.835258	-0.272848	1.10811	Increase	Female
KIAA1522	-0.962734	-0.0707714	1.03351	Increase	Female
CD93	-0.909554	-0.161285	1.07084	Increase	Female
RP4.555D20.2	-0.809043	-0.308982	1.11802	Increase	Female
CDH20	-1.02161	0.0447159	0.976892	Increase	Female
ZMPSTE24	-1.09323	0.224685	0.868544	Increase	Female
HSPA4	-1.09582	0.23267	0.863154	Increase	Female
CRK	-1.04554	0.0983395	0.947197	Increase	Female
NEDD9	-0.962369	-0.0714315	1.0338	Increase	Female
CLINT1	-1.11593	0.301025	0.814909	Increase	Female
YAP1	-0.991318	-0.0171428	1.00846	Increase	Female
ANXA2	-0.988565	-0.0224915	1.01106	Increase	Female
ZNF271P	-1.11467	0.296327	0.818347	Increase	Female
CLDN9	-0.823598	-0.289104	1.1127	Increase	Female
GBA2	-0.995261	-0.00941249	1.00467	Increase	Female
TMEM258	-0.989077	-0.0214986	1.01058	Increase	Female
CHUK	-1.04076	0.0872346	0.953525	Increase	Female
CLK1	-0.77856	-0.34922	1.12778	Increase	Female
SNX3	-1.1419	0.422488	0.719416	Increase	Female
NME1.NME2	-1.09318	0.224539	0.868642	Increase	Female
PAIP1	-1.13525	0.384836	0.75041	Increase	Female
HILPDA	-0.931784	-0.12473	1.05651	Increase	Female
TAB2	-1.08462	0.199244	0.885378	Increase	Female
NCOA5	-0.964745	-0.0671278	1.03187	Increase	Female
BAHD1	-1.03171	0.0667717	0.964941	Increase	Female
ARFGAP3	-1.08624	0.203919	0.882323	Increase	Female
NAALAD2	-0.996	-0.00795237	1.00395	Increase	Female
ARAP2	-1.08796	0.208937	0.879025	Increase	Female
ZHX1	-1.09724	0.237109	0.860135	Increase	Female
NUPL2	-1.09815	0.239949	0.858196	Increase	Female
SS18L1	-1.10889	0.275577	0.833315	Increase	Female
TRIB2	-0.901624	-0.173933	1.07556	Increase	Female
TLN1	-0.998732	-0.00253032	1.00126	Increase	Female
ACADVL	-1.08022	0.186788	0.893436	Increase	Female
PTPN13	-1.11094	0.282797	0.828148	Increase	Female
MRRF	-1.03313	0.0699419	0.963193	Increase	Female
IMPA2	-1.04397	0.0946733	0.949297	Increase	Female
ARHGEF12	-1.10773	0.271542	0.836185	Increase	Female
TSPAN11	-0.911298	-0.158478	1.06978	Increase	Female
PLXND1	-0.834412	-0.274037	1.10845	Increase	Female
DEDD2	-0.866793	-0.227287	1.09408	Increase	Female
TMEM54	-1.13343	0.375657	0.757773	Increase	Female
APPL2	-1.11468	0.296367	0.818318	Increase	Female
P4HA1	-0.908683	-0.162685	1.07137	Increase	Female
MOCS1	-1.104	0.258928	0.845071	Increase	Female
GRK5	-1.12317	0.329492	0.793678	Increase	Female
CPSF7	-1.13375	0.37723	0.756516	Increase	Female
PPP2CB	-1.12158	0.322983	0.798592	Increase	Female
FXYD1	-0.991359	-0.0170644	1.00842	Increase	Female
TRABD	-0.923244	-0.138974	1.06222	Increase	Female
PTPN6	-0.890033	-0.192071	1.0821	Increase	Female
SKA2	-1.06877	0.155847	0.912926	Increase	Female
USP32P2	-0.972459	-0.0529761	1.02544	Increase	Female
AMD1	-1.01341	0.0273812	0.986028	Increase	Female
RP11.71H17.7	-0.982337	-0.034436	1.01677	Increase	Female
TARS	-1.06285	0.140565	0.92228	Increase	Female
DPM1	-1.12515	0.337782	0.787366	Increase	Female
RPL10	-0.862121	-0.234191	1.09631	Increase	Female
PRKD2	-0.931703	-0.124867	1.05657	Increase	Female
CFI	-0.967887	-0.0613961	1.02928	Increase	Female
SMIM12	-1.10994	0.279231	0.830706	Increase	Female
VSIG4	-0.895862	-0.183	1.07886	Increase	Female
CPEB4	-0.879559	-0.208126	1.08769	Increase	Female
ZFP36L2	-1.09437	0.22819	0.866184	Increase	Female
ABCC5	-0.994249	-0.0114052	1.00565	Increase	Female
TMEM167B	-1.09147	0.219368	0.872104	Increase	Female
LAP3	-1.09041	0.216174	0.874233	Increase	Female
CLPTM1L	-1.11667	0.303805	0.812865	Increase	Female
SLC38A5	-0.777967	-0.349986	1.12795	Increase	Female
PITPNC1	-1.08218	0.192288	0.889893	Increase	Female
LYN	-1.12805	0.350412	0.777636	Increase	Female
MAP3K5	-1.11184	0.286002	0.82584	Increase	Female
ANP32A	-1.08716	0.206597	0.880566	Increase	Female
CTB.31O20.2	-0.787284	-0.337889	1.12517	Increase	Female
PHF5A	-1.12819	0.351066	0.777129	Increase	Female
FAM189A2	-1.07108	0.161908	0.909167	Increase	Female
EFNA1	-0.975614	-0.0471068	1.02272	Increase	Female
TGFB1	-0.887354	-0.196208	1.08356	Increase	Female
CDKN1A	-1.03183	0.0670295	0.964799	Increase	Female
CCP110	-0.804198	-0.3155	1.1197	Increase	Female
ATN1	-0.993562	-0.0127547	1.00632	Increase	Female
FRA10AC1	-0.982036	-0.0350089	1.01704	Increase	Female
ZNF436	-1.06341	0.142009	0.921404	Increase	Female
PHF10	-0.906901	-0.165539	1.07244	Increase	Female
COL11A1	-0.831404	-0.278255	1.10966	Increase	Female
CCNG1	-1.00895	0.0181567	0.990798	Increase	Female
ACAD11	-1.05751	0.127198	0.930315	Increase	Female
FSTL1	-1.13232	0.370251	0.762073	Increase	Female
MICU3	-1.03103	0.0652555	0.965774	Increase	Female
TMEM60	-1.13795	0.39926	0.738689	Increase	Female
RP11.488L18.4	-0.905836	-0.16724	1.07308	Increase	Female
CCNG2	-1.14034	0.412922	0.727413	Increase	Female
ZMAT5	-0.928281	-0.130604	1.05888	Increase	Female
DKK3	-1.13139	0.36577	0.765618	Increase	Female
NXN	-0.799096	-0.322313	1.12141	Increase	Female
NOTCH3	-1.06935	0.157352	0.911996	Increase	Female
ZMAT3	-1.12809	0.350617	0.777477	Increase	Female
CPSF6	-1.1235	0.330872	0.792632	Increase	Female
SHISA5	-1.10342	0.257025	0.8464	Increase	Female
SLC7A1	-0.919433	-0.145249	1.06468	Increase	Female
PPM1M	-1.11516	0.298134	0.817027	Increase	Female
CD163	-1.11821	0.309712	0.808502	Increase	Female
HNRNPLL	-1.12988	0.3587	0.771176	Increase	Female
SOS1	-1.0462	0.0998876	0.946308	Increase	Female
ZFAND2A	-1.11778	0.308035	0.809744	Increase	Female
SLC1A1	-1.11882	0.312074	0.80675	Increase	Female
VIMP	-1.12082	0.319938	0.80088	Increase	Female
ZDHHC7	-1.04034	0.0862747	0.954068	Increase	Female
AC018647.3	-0.99821	-0.00356968	1.00178	Increase	Female
SERGEF	-1.00124	0.00247493	0.99876	Increase	Female
PAK2	-1.0743	0.170519	0.903776	Increase	Female
MIR124.2HG	-1.02793	0.0584138	0.969513	Increase	Female
COMMD10	-1.12644	0.343356	0.783089	Increase	Female
TMC8	-0.785352	-0.340412	1.12576	Increase	Female
JOSD1	-1.11934	0.314074	0.805261	Increase	Female
HEXIM1	-0.959016	-0.0774617	1.03648	Increase	Female
2007-03-01	-1.01338	0.0273168	0.986062	Increase	Female
RALGAPA1	-1.09413	0.227445	0.866686	Increase	Female
SNX27	-1.03549	0.0752241	0.960264	Increase	Female
PFKP	-0.960409	-0.0749638	1.03537	Increase	Female
IL13RA1	-0.899382	-0.177473	1.07685	Increase	Female
MED17	-1.08019	0.186698	0.893493	Increase	Female
SMIM3	-0.889203	-0.193355	1.08256	Increase	Female
TMEM14C	-1.04495	0.0969576	0.94799	Increase	Female
STK19	-1.1328	0.372558	0.760241	Increase	Female
TOB2	-0.897677	-0.180154	1.07783	Increase	Female
GMFB	-1.11123	0.283815	0.827415	Increase	Female
HECA	-1.05747	0.127102	0.930372	Increase	Female
PXK	-1.13703	0.394236	0.742794	Increase	Female
DBI	-1.00357	0.00717648	0.996392	Increase	Female
ATRAID	-1.10146	0.250574	0.850884	Increase	Female
ZNF420	-0.929076	-0.129275	1.05835	Increase	Female
HIBADH	-1.1407	0.41507	0.725625	Increase	Female
LMO2	-0.877872	-0.210683	1.08856	Increase	Female
CYBB	-0.993623	-0.0126334	1.00626	Increase	Female
LHFPL2	-0.940238	-0.110367	1.05061	Increase	Female
G3BP1	-0.937729	-0.114657	1.05239	Increase	Female
LSM14A	-1.11951	0.314746	0.804761	Increase	Female
MYD88	-1.08862	0.210887	0.877737	Increase	Female
TRIM8	-0.990369	-0.0189905	1.00936	Increase	Female
PRELP	-0.890082	-0.191995	1.08208	Increase	Female
ATXN7L2	-1.01273	0.0259594	0.986768	Increase	Female
CD34	-0.880936	-0.206033	1.08697	Increase	Female
RELB	-1.10357	0.257493	0.846073	Increase	Female
MOB3A	-0.94727	-0.0982133	1.04548	Increase	Female
HMG20B	-0.978481	-0.0417323	1.02021	Increase	Female
UBE2D4	-1.13838	0.401673	0.736711	Increase	Female
NINJ1	-0.814696	-0.301315	1.11601	Increase	Female
GDF11	-1.05447	0.119711	0.934756	Increase	Female
EMC2	-1.13379	0.377449	0.756341	Increase	Female
KLF6	-1.0994	0.24393	0.855467	Increase	Female
HIBCH	-1.00172	0.00345375	0.998269	Increase	Female
SYVN1	-1.11301	0.290211	0.822796	Increase	Female
LAT2	-0.819709	-0.294459	1.11417	Increase	Female
RAB21	-1.12402	0.333005	0.79101	Increase	Female
SH3BGRL	-1.14021	0.41215	0.728055	Increase	Female
BSDC1	-1.03316	0.069993	0.963165	Increase	Female
RBM39	-1.01932	0.0398248	0.979493	Increase	Female
JUNB	-1.13225	0.369912	0.762342	Increase	Female
CD14	-0.964712	-0.0671875	1.0319	Increase	Female
GBP2	-1.13364	0.376716	0.756927	Increase	Female
PIK3R4	-1.07407	0.169921	0.904153	Increase	Female
SPARC	-1.01851	0.038112	0.980399	Increase	Female
LY96	-0.842819	-0.262141	1.10496	Increase	Female
APOC4.APOC2	-1.03605	0.0764837	0.959562	Increase	Female
BNIP2	-1.08784	0.208571	0.879266	Increase	Female
NPC1	-1.02129	0.044034	0.977256	Increase	Female
RPRD1A	-1.06113	0.136217	0.924909	Increase	Female
RGS16	-0.855543	-0.243819	1.09936	Increase	Female
GPRC5B	-1.07163	0.163377	0.908252	Increase	Female
SBDSP1	-1.13095	0.363685	0.767262	Increase	Female
MRPL49	-0.900173	-0.176225	1.0764	Increase	Female
KSR1	-1.07757	0.179447	0.898127	Increase	Female
TMOD3	-1.02543	0.0529653	0.972465	Increase	Female
OGT	-1.03175	0.0668627	0.964891	Increase	Female
GOLGA7	-1.04606	0.0995578	0.946497	Increase	Female
NELFA	-0.837828	-0.269223	1.10705	Increase	Female
PTRF	-1.03557	0.0754089	0.960161	Increase	Female
GNG5	-1.10382	0.25832	0.845495	Increase	Female
ZMYM4	-1.12211	0.325149	0.796961	Increase	Female
RAB28	-1.06013	0.133711	0.926417	Increase	Female
SMAD2	-1.07782	0.180132	0.897691	Increase	Female
DUSP1	-1.096	0.233224	0.862778	Increase	Female
LST1	-0.942387	-0.106673	1.04906	Increase	Female
DAZAP1	-1.13871	0.403492	0.735214	Increase	Female
HBEGF	-0.860925	-0.23595	1.09688	Increase	Female
RCC2	-0.965026	-0.0666177	1.03164	Increase	Female
TEKT4P2	-1.03918	0.0836205	0.955564	Increase	Female
PYCR1	-0.999058	-0.00188192	1.00094	Increase	Female
RPS2P46	-0.86087	-0.236031	1.0969	Increase	Female
PEA15	-1.09081	0.21737	0.873437	Increase	Female
MKLN1	-1.06205	0.138545	0.923503	Increase	Female
SQRDL	-1.04756	0.103105	0.944453	Increase	Female
NEO1	-1.04669	0.101042	0.945643	Increase	Female
ING4	-0.938387	-0.113536	1.05192	Increase	Female
ABHD2	-0.888201	-0.194903	1.0831	Increase	Female
H1F0	-0.910244	-0.160177	1.07042	Increase	Female
ILF2	-1.11981	0.315957	0.803857	Increase	Female
ST6GAL1	-1.01543	0.0316032	0.983824	Increase	Female
CD300A	-0.79398	-0.329093	1.12307	Increase	Female
ZNF768	-0.77028	-0.359844	1.13012	Increase	Female
RGL2	-0.821269	-0.292315	1.11358	Increase	Female
PPP1R1A	-0.780483	-0.346735	1.12722	Increase	Female
DPP9	-0.92382	-0.138021	1.06184	Increase	Female
CUL3	-1.06062	0.134945	0.925675	Increase	Female
KDM6A	-1.05297	0.116062	0.936905	Increase	Female
SEMA3F	-0.870301	-0.222065	1.09237	Increase	Female
SYS1	-1.09925	0.243472	0.855782	Increase	Female
PILRB	-1.12744	0.347718	0.779723	Increase	Female
MTSS1	-1.00288	0.00578054	0.997097	Increase	Female
STK36	-0.933973	-0.121037	1.05501	Increase	Female
C1R	-1.13978	0.409637	0.73014	Increase	Female
RAMP3	-0.795982	-0.326446	1.12243	Increase	Female
RCAN1	-1.08058	0.187798	0.892787	Increase	Female
RERE	-0.965243	-0.0662223	1.03147	Increase	Female
SCIN	-0.903388	-0.171137	1.07452	Increase	Female
SYNGR2	-1.01274	0.0259813	0.986756	Increase	Female
ANLN	-0.994836	-0.0102496	1.00509	Increase	Female
GTF3C3	-1.0481	0.104378	0.943717	Increase	Female
UHRF2	-1.11382	0.293169	0.820648	Increase	Female
XRN2	-1.06612	0.148947	0.917172	Increase	Female
RBM33	-0.898161	-0.179394	1.07756	Increase	Female
NCBP2	-1.11899	0.312706	0.80628	Increase	Female
PAXBP1	-1.04457	0.0960778	0.948494	Increase	Female
SP3	-1.0351	0.0743595	0.960745	Increase	Female
FAM13B	-1.0769	0.177607	0.899297	Increase	Female
BHLHE40	-1.11933	0.314061	0.805271	Increase	Female
A4GALT	-1.07351	0.168417	0.905098	Increase	Female
ELF2	-1.0237	0.0492187	0.974482	Increase	Female
TOR3A	-1.08546	0.201663	0.8838	Increase	Female
TRAPPC8	-1.01722	0.0353831	0.981839	Increase	Female
SRGN	-0.947154	-0.0984153	1.04557	Increase	Female
CAPN7	-0.887915	-0.195343	1.08326	Increase	Female
SERTAD3	-0.92576	-0.134803	1.06056	Increase	Female
RAF1	-1.08902	0.21206	0.876962	Increase	Female
SALL1	-1.07256	0.165857	0.906702	Increase	Female
PLPP4	-0.985445	-0.0285003	1.01395	Increase	Female
RAB10	-1.11896	0.312599	0.806359	Increase	Female
ADM	-0.994227	-0.011447	1.00567	Increase	Female
CHST11	-0.884759	-0.200194	1.08495	Increase	Female
RBMS1	-1.08966	0.21394	0.875716	Increase	Female
RDX	-1.10252	0.254041	0.848478	Increase	Female
RAB13	-0.97011	-0.057314	1.02742	Increase	Female
DNTTIP2	-1.12878	0.353683	0.775094	Increase	Female
GADD45B	-1.07522	0.173029	0.902195	Increase	Female
BST2	-0.941766	-0.107743	1.04951	Increase	Female
RAMP1	-1.11603	0.301402	0.814632	Increase	Female
FAM43B	-0.803677	-0.316198	1.11988	Increase	Female
NR3C1	-0.913469	-0.154968	1.06844	Increase	Female
PYGL	-1.05573	0.122801	0.932928	Increase	Female
CACYBP	-1.12607	0.341746	0.784327	Increase	Female
DDX39A	-1.01212	0.0247065	0.987418	Increase	Female
ZBTB38	-1.04296	0.0923267	0.950635	Increase	Female
NR1D1	-1.00192	0.00384908	0.99807	Increase	Female
LSMEM1	-0.779372	-0.348172	1.12754	Increase	Female
RP11.155G14.6	-1.1036	0.257607	0.845994	Increase	Female
SH3GL1	-1.01957	0.0403629	0.979207	Increase	Female
PLEKHA1	-1.05566	0.122625	0.933033	Increase	Female
KIAA1147	-0.888217	-0.194878	1.08309	Increase	Female
TAP1	-1.07502	0.172486	0.902537	Increase	Female
GRAMD1A	-1.12973	0.358035	0.771697	Increase	Female
RP11.488L18.10	-0.770384	-0.359711	1.1301	Increase	Female
OAS1	-1.08281	0.194075	0.888737	Increase	Female
ZDHHC18	-0.917178	-0.148938	1.06612	Increase	Female
ITGAX	-0.882028	-0.20437	1.0864	Increase	Female
KIF13A	-0.859673	-0.237787	1.09746	Increase	Female
SUMO2	-1.09899	0.242646	0.856349	Increase	Female
RPL23A	-1.08753	0.207666	0.879862	Increase	Female
PHLPP1	-0.972134	-0.0535775	1.02571	Increase	Female
KAT6A	-0.978284	-0.0421028	1.02039	Increase	Female
ERAL1	-1.00325	0.00653345	0.996717	Increase	Female
SSH1	-0.967477	-0.0621466	1.02962	Increase	Female
EPS8	-1.01042	0.0211732	0.989245	Increase	Female
RPL22L1	-1.10295	0.255467	0.847486	Increase	Female
SOCS3	-0.88545	-0.199135	1.08458	Increase	Female
SMARCE1	-1.1371	0.394611	0.742487	Increase	Female
GBAP1	-1.06996	0.158959	0.911	Increase	Female
RWDD3	-1.13585	0.387978	0.747874	Increase	Female
FIP1L1	-1.11552	0.299485	0.816038	Increase	Female
NDUFS2	-1.11668	0.303857	0.812827	Increase	Female
S100A10	-1.13366	0.376802	0.756858	Increase	Female
UBE2B	-1.04282	0.0919882	0.950828	Increase	Female
ZNF592	-1.01563	0.0320214	0.983605	Increase	Female
GNAI3	-1.03399	0.0718532	0.962135	Increase	Female
JADE2	-0.977538	-0.0435049	1.02104	Increase	Female
PLXNB2	-1.00766	0.0154926	0.992164	Increase	Female
LINC01105	-0.992163	-0.0154938	1.00766	Increase	Female
WDR33	-1.00361	0.00725461	0.996353	Increase	Female
XPO1	-0.976832	-0.0448285	1.02166	Increase	Female
KIF5C	-0.972392	-0.0531009	1.02549	Increase	Female
SIRT1	-0.873159	-0.217787	1.09095	Increase	Female
IFI27	-0.942178	-0.107034	1.04921	Increase	Female
UNC119B	-1.00168	0.00336244	0.998315	Increase	Female
KLHDC2	-1.0483	0.104854	0.943441	Increase	Female
RP11.1212A22.4	-0.985938	-0.0275546	1.01349	Increase	Female
ELOVL1	-1.114	0.293859	0.820146	Increase	Female
SMG5	-0.809663	-0.308144	1.11781	Increase	Female
TRIM21	-1.07083	0.161262	0.909569	Increase	Female
FLNA	-1.00223	0.00447644	0.997754	Increase	Female
REXO2	-1.13555	0.386394	0.749154	Increase	Female
ERGIC1	-0.998607	-0.00277956	1.00139	Increase	Female
DNM2	-0.748722	-0.386929	1.13565	Increase	Female
HACD2	-0.970083	-0.0573652	1.02745	Increase	Female
SNHG19	-1.07718	0.178362	0.898817	Increase	Female
UNG	-0.926455	-0.133648	1.0601	Increase	Female
PPM1A	-1.02013	0.0415532	0.978576	Increase	Female
LINC.PINT	-1.05654	0.124795	0.931745	Increase	Female
TATDN2	-1.09554	0.231784	0.863754	Increase	Female
KIAA1551	-0.877722	-0.210911	1.08863	Increase	Female
PDE2A	-0.946395	-0.0997364	1.04613	Increase	Female
PRIMPOL	-0.960537	-0.0747337	1.03527	Increase	Female
JAG1	-1.06802	0.153886	0.914137	Increase	Female
NUFIP2	-0.989574	-0.0205352	1.01011	Increase	Female
TMEM9B	-1.11612	0.30172	0.814399	Increase	Female
HSD11B1	-1.07412	0.170052	0.90407	Increase	Female
PCBD1	-1.05755	0.127299	0.930255	Increase	Female
MSN	-1.01239	0.0252609	0.98713	Increase	Female
RPL7	-0.983531	-0.0321627	1.01569	Increase	Female
GPER1	-0.883078	-0.202766	1.08584	Increase	Female
CTSC	-0.919697	-0.144814	1.06451	Increase	Female
LSS	-1.0678	0.153317	0.914487	Increase	Female
INTS12	-1.04557	0.0984156	0.947153	Increase	Female
PDXP	-0.846457	-0.256942	1.1034	Increase	Female
SGPL1	-1.09302	0.224062	0.868962	Increase	Female
CD52	-1.03519	0.0745427	0.960643	Increase	Female
MGAT1	-0.908995	-0.162183	1.07118	Increase	Female
PIK3CD	-0.928757	-0.129808	1.05857	Increase	Female
MAP2K3	-0.866935	-0.227077	1.09401	Increase	Female
IGIP	-1.08099	0.188933	0.892057	Increase	Female
UCP2	-0.976879	-0.0447399	1.02162	Increase	Female
RP4.639F20.1	-0.998229	-0.00353357	1.00176	Increase	Female
LAMP2	-0.963977	-0.0685213	1.0325	Increase	Female
ITPRIP	-0.866535	-0.22767	1.0942	Increase	Female
EMCN	-0.942438	-0.106585	1.04902	Increase	Female
BGN	-1.10376	0.258138	0.845622	Increase	Female
TSC22D1	-1.13207	0.369006	0.76306	Increase	Female
CCDC69	-0.914997	-0.15249	1.06749	Increase	Female
TMED5	-1.08143	0.19018	0.891254	Increase	Female
RNPEPL1	-0.945964	-0.100485	1.04645	Increase	Female
RPL21	-0.927782	-0.131436	1.05922	Increase	Female
DDX3X	-1.07314	0.167407	0.905731	Increase	Female
ACVR1	-1.07109	0.161944	0.909144	Increase	Female
LRP4	-0.998085	-0.00381951	1.0019	Increase	Female
MYO1F	-0.84469	-0.259471	1.10416	Increase	Female
BCAR1	-1.05517	0.121431	0.93374	Increase	Female
LEPROT	-1.12425	0.333987	0.790263	Increase	Female
DNAJC25	-1.00021	0.000420794	0.99979	Increase	Female
POU3F3	-1.03287	0.069349	0.96352	Increase	Female
CNOT1	-1.02743	0.0573173	0.970109	Increase	Female
STARD3	-1.02424	0.0503854	0.973855	Increase	Female
SNAP23	-0.825644	-0.286273	1.11192	Increase	Female
UNC5B	-0.993431	-0.013012	1.00644	Increase	Female
HCK	-0.983772	-0.0317021	1.01547	Increase	Female
SFPQ	-1.13211	0.369223	0.762888	Increase	Female
TINAGL1	-0.867793	-0.225801	1.09359	Increase	Female
RPL18A	-1.12562	0.339792	0.785826	Increase	Female
SRRT	-0.834525	-0.273878	1.1084	Increase	Female
HTRA2	-1.04488	0.0967903	0.948086	Increase	Female
MED12	-1.02602	0.0542569	0.971767	Increase	Female
KCTD10	-0.994106	-0.011686	1.00579	Increase	Female
MEX3C	-0.917325	-0.148697	1.06602	Increase	Female
VPS72	-0.98826	-0.0230813	1.01134	Increase	Female
FLCN	-0.832008	-0.27741	1.10942	Increase	Female
PODXL	-0.976268	-0.0458838	1.02215	Increase	Female
PLA2G5	-1.08349	0.195995	0.887492	Increase	Female
DAD1	-1.09683	0.235819	0.861014	Increase	Female
APTX	-1.11888	0.312285	0.806592	Increase	Female
TJAP1	-1.01613	0.0330711	0.983054	Increase	Female
NADK2	-1.10412	0.25932	0.844796	Increase	Female
SRSF6	-1.00583	0.01177	0.994063	Increase	Female
BANP	-0.904233	-0.169793	1.07403	Increase	Female
RELA	-0.950136	-0.0932023	1.04334	Increase	Female
HSPA1B	-0.995806	-0.00833592	1.00414	Increase	Female
CNPY3	-0.916198	-0.150535	1.06673	Increase	Female
PYGM	-1.09524	0.230849	0.864388	Increase	Female
SRSF3	-1.13213	0.369313	0.762817	Increase	Female
GPR137	-1.01526	0.0312626	0.984002	Increase	Female
MTO1	-1.06127	0.13657	0.924696	Increase	Female
HGF	-1.08201	0.191798	0.89021	Increase	Female
LAIR1	-0.897286	-0.180768	1.07805	Increase	Female
SLC29A1	-0.954921	-0.0847616	1.03968	Increase	Female
RGS3	-0.800003	-0.321106	1.12111	Increase	Female
PCF11	-1.03821	0.0813962	0.956814	Increase	Female
RBMS2	-0.938244	-0.113779	1.05202	Increase	Female
DDX17	-1.02902	0.0608209	0.968201	Increase	Female
ALG2	-1.04853	0.105408	0.943121	Increase	Female
DHRS3	-1.10732	0.270155	0.837168	Increase	Female
ABCD4	-0.760315	-0.372465	1.13278	Increase	Female
WASF2	-0.994305	-0.0112951	1.0056	Increase	Female
RANBP3	-1.11107	0.283235	0.827832	Increase	Female
TRMT1	-0.799513	-0.321758	1.12127	Increase	Female
PHLDA1	-0.938795	-0.112838	1.05163	Increase	Female
HMGN3	-1.09278	0.223308	0.869468	Increase	Female
SLC43A3	-0.820121	-0.293894	1.11401	Increase	Female
SLC6A9	-0.854417	-0.245456	1.09987	Increase	Female
RNU1.2	-0.865849	-0.228686	1.09454	Increase	Female
CASC4	-1.07049	0.160369	0.910124	Increase	Female
TMEM47	-1.1371	0.394604	0.742494	Increase	Female
FBRS	-0.746924	-0.389151	1.13607	Increase	Female
PAPD5	-0.886584	-0.197393	1.08398	Increase	Female
SNX5	-1.11656	0.3034	0.813163	Increase	Female
STAT2	-1.13372	0.377092	0.756627	Increase	Female
BHLHE41	-1.04153	0.0890107	0.952519	Increase	Female
ERCC3	-1.12794	0.34992	0.778018	Increase	Female
[truncated: 3,180 more rows]
